# Supplementary material for: Insights on Proteomics-Driven Body Fluid-Based Biomarkers of Cervical Cancer
Source: MDPI journal article supplement (doi:10.3390/proteomes10020013), 2022-04-29
Supplement: s1 [file s1]

**Supplementary Table S1: List of proteins used for metadata analysis**

| <b>Literature referred</b>   | <b>Van Raemdonck et al.</b>                                                                                                                                                                                                                                                                                                                             | <b>Starodubtseva et al.</b>                                           | <b>Van Ostade et al.</b>                                                                                                                                                                                                                                                                                                                              |
|------------------------------|---------------------------------------------------------------------------------------------------------------------------------------------------------------------------------------------------------------------------------------------------------------------------------------------------------------------------------------------------------|-----------------------------------------------------------------------|-------------------------------------------------------------------------------------------------------------------------------------------------------------------------------------------------------------------------------------------------------------------------------------------------------------------------------------------------------|
| <b>Criteria of selection</b> | Increased levels in CVF from women with adenocarcinoma:<br>Increased levels in CVF from women with precancerous lesions with stringent statistical selection based on Pearson Chi squared and Mann-Whitney U tests ( $p < 0.05$ )<br>: Exclusive occurrence in CVF from women with precancerous lesions and described to be involved in cervical cancer | Explicit and implied upregulation in (CANCER, HSIL, and LSIL) vs NILM | Proteins with a statistically significant difference in frequency between the healthy and precancerous group and those with a statistically significant difference in abundance between the healthy and precancerous group (Table 1 and Table 2 of Van Ostade et al., 2017). Those proteins with higher parameter values in both tables are enlisted. |
| <b>Uniprot IDs</b>           | O43707                                                                                                                                                                                                                                                                                                                                                  | P02763                                                                | Q13984                                                                                                                                                                                                                                                                                                                                                |
|                              | P00558                                                                                                                                                                                                                                                                                                                                                  | P02765                                                                | Q969X2                                                                                                                                                                                                                                                                                                                                                |
|                              | P29373                                                                                                                                                                                                                                                                                                                                                  | P01023                                                                | P62258                                                                                                                                                                                                                                                                                                                                                |
|                              | P29508                                                                                                                                                                                                                                                                                                                                                  | P01024                                                                | P61158                                                                                                                                                                                                                                                                                                                                                |
|                              | P43490                                                                                                                                                                                                                                                                                                                                                  | P02675                                                                | O43707                                                                                                                                                                                                                                                                                                                                                |
|                              | P61158                                                                                                                                                                                                                                                                                                                                                  | P02679                                                                | P07355                                                                                                                                                                                                                                                                                                                                                |
|                              | P62258                                                                                                                                                                                                                                                                                                                                                  | P05155                                                                | P06576                                                                                                                                                                                                                                                                                                                                                |
|                              | Q5VTE0                                                                                                                                                                                                                                                                                                                                                  | P02774                                                                | P29373                                                                                                                                                                                                                                                                                                                                                |
|                              | Q9UIV8                                                                                                                                                                                                                                                                                                                                                  | P68133                                                                | P43490                                                                                                                                                                                                                                                                                                                                                |

|  |        |        |        |
|--|--------|--------|--------|
|  | P06576 | P62736 | P00558 |
|  | P07355 | P68032 | Q5VTE0 |
|  | P14618 | P63267 | P14618 |
|  | P00338 | P07355 | P29508 |
|  |        | D1MGQ2 | P01019 |
|  |        | P04004 | P27348 |
|  |        | P02671 | P09525 |
|  |        | O43707 | P07858 |
|  |        | Q9HC84 | P13987 |
|  |        | Q92876 | P00450 |
|  |        | O43240 | P06396 |
|  |        |        | Q9HC84 |
|  |        |        | P60660 |
|  |        |        | P18669 |
|  |        |        | P30101 |
|  |        |        | P25815 |

|  |  |  |        |
|--|--|--|--------|
|  |  |  | Q9UIV8 |
|  |  |  | P40121 |
|  |  |  | P14174 |
|  |  |  | Q14116 |
|  |  |  | P26583 |
|  |  |  | P04179 |
