# Supplementary material for: Insights on Proteomics-Driven Body Fluid-Based Biomarkers of Cervical Cancer
Source: Proteomes. 2022 Apr 29;10(2):13. doi: 10.3390/proteomes10020013 (PMC9149910; doi:10.3390/proteomes10020013)
Supplement: Supplementary file 1 [file proteomes-10-00013-s001.zip]

Archive with 7 entries (7 files):
- Supplementary Table S2_ Enriched cellular processes obtained from STRING webserver.xlsx
- Supplementary Table S3_ Enriched cellular functions obtained from STRING webserver.xlsx
- Supplementary Table S4_ Enriched cellular components obtained from STRING webserver.xlsx
- Supplementary Table S5_ Enriched KEGG pathways from STRING webserver.xlsx
- Supplementary Table S6_ Enriched REACTOME pathways from STRING webserver.xlsx
- Supplementary Table S7_ Enriched subcellular compartments from STRING webserver.xlsx
- Supplementary Table S1_  List of proteins used for metadata analysis.pdf
