# Supplementary material for: Insights on Proteomics-Driven Body Fluid-Based Biomarkers of Cervical Cancer
Source: Proteomes. 2022 Apr 29;10(2):13. doi: 10.3390/proteomes10020013 (PMC9149910; doi:10.3390/proteomes10020013)
Supplement: Supplementary file 1 [file proteomes-10-00013-s001.zip › Supplementary Table S2_ Enriched cellular processes obtained from STRING webserver.xlsx]

## Sheet: Sheet 1 - enrichment.Process-11
Enriched cellular processes obtained from STRING webserver
#term ID	term description	observed gene count	background gene count	strength	false discovery rate	matching proteins in your network (IDs)	matching proteins in your network (labels)
GO:0045055	regulated exocytosis	18	697	1.03	3.11e-10	9606.ENSP00000215754,9606.ENSP00000245907,9606.ENSP00000252699,9606.ENSP00000259396,9606.ENSP00000278407,9606.ENSP00000283752,9606.ENSP00000296370,9606.ENSP00000306099,9606.ENSP00000306361,9606.ENSP00000320171,9606.ENSP00000323929,9606.ENSP00000336829,9606.ENSP00000345672,9606.ENSP00000346032,9606.ENSP00000359991,9606.ENSP00000362924,9606.ENSP00000379191,9606.ENSP00000393887	MIF,C3,ACTN4,ORM1,SERPING1,SERPINB3,S100P,FGB,FGA,PKM,A2M,FGG,CTSB,ANXA2,PGAM1,GSN,CD59,AHSG
GO:0032940	secretion by cell	19	979	0.91	2.36e-09	9606.ENSP00000215754,9606.ENSP00000245907,9606.ENSP00000252699,9606.ENSP00000259396,9606.ENSP00000278407,9606.ENSP00000283752,9606.ENSP00000296370,9606.ENSP00000306099,9606.ENSP00000306361,9606.ENSP00000320171,9606.ENSP00000323929,9606.ENSP00000336829,9606.ENSP00000345672,9606.ENSP00000346032,9606.ENSP00000355627,9606.ENSP00000359991,9606.ENSP00000362924,9606.ENSP00000379191,9606.ENSP00000393887	MIF,C3,ACTN4,ORM1,SERPING1,SERPINB3,S100P,FGB,FGA,PKM,A2M,FGG,CTSB,ANXA2,AGT,PGAM1,GSN,CD59,AHSG
GO:0002274	myeloid leukocyte activation	14	585	1	2.08e-07	9606.ENSP00000215754,9606.ENSP00000222553,9606.ENSP00000245907,9606.ENSP00000259396,9606.ENSP00000280357,9606.ENSP00000283752,9606.ENSP00000296370,9606.ENSP00000320171,9606.ENSP00000345672,9606.ENSP00000346032,9606.ENSP00000359991,9606.ENSP00000362924,9606.ENSP00000379191,9606.ENSP00000393887	MIF,NAMPT,C3,ORM1,IL18,SERPINB3,S100P,PKM,CTSB,ANXA2,PGAM1,GSN,CD59,AHSG
GO:0042119	neutrophil activation	13	497	1.04	3.35e-07	9606.ENSP00000215754,9606.ENSP00000245907,9606.ENSP00000259396,9606.ENSP00000280357,9606.ENSP00000283752,9606.ENSP00000296370,9606.ENSP00000320171,9606.ENSP00000345672,9606.ENSP00000346032,9606.ENSP00000359991,9606.ENSP00000362924,9606.ENSP00000379191,9606.ENSP00000393887	MIF,C3,ORM1,IL18,SERPINB3,S100P,PKM,CTSB,ANXA2,PGAM1,GSN,CD59,AHSG
GO:0001775	cell activation	17	1075	0.82	4.49e-07	9606.ENSP00000215754,9606.ENSP00000222553,9606.ENSP00000245907,9606.ENSP00000259396,9606.ENSP00000280357,9606.ENSP00000283752,9606.ENSP00000296370,9606.ENSP00000306099,9606.ENSP00000306361,9606.ENSP00000320171,9606.ENSP00000336829,9606.ENSP00000345672,9606.ENSP00000346032,9606.ENSP00000359991,9606.ENSP00000362924,9606.ENSP00000379191,9606.ENSP00000393887	MIF,NAMPT,C3,ORM1,IL18,SERPINB3,S100P,FGB,FGA,PKM,FGG,CTSB,ANXA2,PGAM1,GSN,CD59,AHSG
GO:0002443	leukocyte mediated immunity	14	641	0.96	4.49e-07	9606.ENSP00000215754,9606.ENSP00000245907,9606.ENSP00000259396,9606.ENSP00000278407,9606.ENSP00000280357,9606.ENSP00000283752,9606.ENSP00000296370,9606.ENSP00000320171,9606.ENSP00000345672,9606.ENSP00000346032,9606.ENSP00000359991,9606.ENSP00000362924,9606.ENSP00000379191,9606.ENSP00000393887	MIF,C3,ORM1,SERPING1,IL18,SERPINB3,S100P,PKM,CTSB,ANXA2,PGAM1,GSN,CD59,AHSG
GO:0016192	vesicle-mediated transport	21	1805	0.69	4.49e-07	9606.ENSP00000215754,9606.ENSP00000226218,9606.ENSP00000245907,9606.ENSP00000251595,9606.ENSP00000252699,9606.ENSP00000259396,9606.ENSP00000263238,9606.ENSP00000278407,9606.ENSP00000283752,9606.ENSP00000296370,9606.ENSP00000306099,9606.ENSP00000306361,9606.ENSP00000320171,9606.ENSP00000323929,9606.ENSP00000336829,9606.ENSP00000345672,9606.ENSP00000346032,9606.ENSP00000359991,9606.ENSP00000362924,…	MIF,VTN,C3,HBA2,ACTN4,ORM1,ACTR3,SERPING1,SERPINB3,S100P,FGB,FGA,PKM,A2M,FGG,CTSB,ANXA2,PGAM1,GSN,CD59,AHSG
GO:0010951	negative regulation of endopeptidase activity	10	248	1.22	6.42e-07	9606.ENSP00000226218,9606.ENSP00000245907,9606.ENSP00000264335,9606.ENSP00000278407,9606.ENSP00000283752,9606.ENSP00000323929,9606.ENSP00000341584,9606.ENSP00000346032,9606.ENSP00000355627,9606.ENSP00000393887	VTN,C3,YWHAE,SERPING1,SERPINB3,A2M,SERPINB13,ANXA2,AGT,AHSG
GO:0050896	response to stimulus	40	8046	0.32	8.37e-07	9606.ENSP00000215754,9606.ENSP00000222553,9606.ENSP00000226218,9606.ENSP00000245907,9606.ENSP00000251595,9606.ENSP00000252699,9606.ENSP00000259396,9606.ENSP00000262030,9606.ENSP00000263238,9606.ENSP00000264335,9606.ENSP00000278407,9606.ENSP00000280357,9606.ENSP00000283752,9606.ENSP00000290378,9606.ENSP00000296370,9606.ENSP00000296503,9606.ENSP00000300289,9606.ENSP00000306099,9606.ENSP00000306361,…	MIF,NAMPT,VTN,C3,HBA2,ACTN4,ORM1,ATP5B,ACTR3,YWHAE,SERPING1,IL18,SERPINB3,ACTC1,S100P,HMGB2,PDIA3,FGB,FGA,PKM,A2M,FGG,SERPINB13,CTSB,ANXA2,AGT,ACTA1,PGAM1,PGK1,GSN,KLK6,YWHAQ,ANXA4,CD59,AHSG,ACTA2,MUC5B,LDHA,SOD2,CRABP2
GO:0051649	establishment of localization in cell	23	2375	0.61	9.08e-07	9606.ENSP00000215754,9606.ENSP00000245907,9606.ENSP00000252699,9606.ENSP00000259396,9606.ENSP00000262030,9606.ENSP00000263238,9606.ENSP00000264335,9606.ENSP00000278407,9606.ENSP00000283752,9606.ENSP00000296370,9606.ENSP00000306099,9606.ENSP00000306361,9606.ENSP00000320171,9606.ENSP00000323929,9606.ENSP00000336829,9606.ENSP00000345672,9606.ENSP00000346032,9606.ENSP00000355627,9606.ENSP00000359991,…	MIF,C3,ACTN4,ORM1,ATP5B,ACTR3,YWHAE,SERPING1,SERPINB3,S100P,FGB,FGA,PKM,A2M,FGG,CTSB,ANXA2,AGT,PGAM1,GSN,YWHAQ,CD59,AHSG
GO:0002576	platelet degranulation	8	129	1.41	1.26e-06	9606.ENSP00000252699,9606.ENSP00000259396,9606.ENSP00000278407,9606.ENSP00000306099,9606.ENSP00000306361,9606.ENSP00000323929,9606.ENSP00000336829,9606.ENSP00000393887	ACTN4,ORM1,SERPING1,FGB,FGA,A2M,FGG,AHSG
GO:0043312	neutrophil degranulation	12	484	1.01	1.44e-06	9606.ENSP00000215754,9606.ENSP00000245907,9606.ENSP00000259396,9606.ENSP00000283752,9606.ENSP00000296370,9606.ENSP00000320171,9606.ENSP00000345672,9606.ENSP00000346032,9606.ENSP00000359991,9606.ENSP00000362924,9606.ENSP00000379191,9606.ENSP00000393887	MIF,C3,ORM1,SERPINB3,S100P,PKM,CTSB,ANXA2,PGAM1,GSN,CD59,AHSG
GO:0006955	immune response	19	1588	0.7	1.49e-06	9606.ENSP00000215754,9606.ENSP00000226218,9606.ENSP00000245907,9606.ENSP00000259396,9606.ENSP00000263238,9606.ENSP00000278407,9606.ENSP00000280357,9606.ENSP00000283752,9606.ENSP00000296370,9606.ENSP00000296503,9606.ENSP00000306099,9606.ENSP00000306361,9606.ENSP00000320171,9606.ENSP00000345672,9606.ENSP00000346032,9606.ENSP00000359991,9606.ENSP00000362924,9606.ENSP00000379191,9606.ENSP00000393887	MIF,VTN,C3,ORM1,ACTR3,SERPING1,IL18,SERPINB3,S100P,HMGB2,FGB,FGA,PKM,CTSB,ANXA2,PGAM1,GSN,CD59,AHSG
GO:0080134	regulation of response to stress	18	1437	0.72	1.91e-06	9606.ENSP00000215754,9606.ENSP00000222553,9606.ENSP00000226218,9606.ENSP00000245907,9606.ENSP00000264335,9606.ENSP00000278407,9606.ENSP00000280357,9606.ENSP00000283752,9606.ENSP00000296503,9606.ENSP00000306099,9606.ENSP00000306361,9606.ENSP00000323929,9606.ENSP00000336829,9606.ENSP00000346032,9606.ENSP00000355627,9606.ENSP00000393887,9606.ENSP00000436812,9606.ENSP00000446252	MIF,NAMPT,VTN,C3,YWHAE,SERPING1,IL18,SERPINB3,HMGB2,FGB,FGA,A2M,FGG,ANXA2,AGT,AHSG,MUC5B,SOD2
GO:0030195	negative regulation of blood coagulation	6	47	1.73	2.16e-06	9606.ENSP00000226218,9606.ENSP00000278407,9606.ENSP00000306099,9606.ENSP00000306361,9606.ENSP00000336829,9606.ENSP00000346032	VTN,SERPING1,FGB,FGA,FGG,ANXA2
GO:0042730	fibrinolysis	5	20	2.02	2.25e-06	9606.ENSP00000278407,9606.ENSP00000306099,9606.ENSP00000306361,9606.ENSP00000336829,9606.ENSP00000346032	SERPING1,FGB,FGA,FGG,ANXA2
GO:0090131	mesenchyme migration	4	5	2.52	2.25e-06	9606.ENSP00000290378,9606.ENSP00000355645,9606.ENSP00000386857,9606.ENSP00000402373	ACTC1,ACTA1,ACTG2,ACTA2
GO:2001233	regulation of apoptotic signaling pathway	11	409	1.05	2.25e-06	9606.ENSP00000215754,9606.ENSP00000264335,9606.ENSP00000296503,9606.ENSP00000300289,9606.ENSP00000306099,9606.ENSP00000306361,9606.ENSP00000336829,9606.ENSP00000355627,9606.ENSP00000362924,9606.ENSP00000371267,9606.ENSP00000446252	MIF,YWHAE,HMGB2,PDIA3,FGB,FGA,FGG,AGT,GSN,YWHAQ,SOD2
GO:0052548	regulation of endopeptidase activity	11	418	1.04	2.35e-06	9606.ENSP00000226218,9606.ENSP00000245907,9606.ENSP00000264335,9606.ENSP00000278407,9606.ENSP00000283752,9606.ENSP00000323929,9606.ENSP00000341584,9606.ENSP00000346032,9606.ENSP00000355627,9606.ENSP00000362924,9606.ENSP00000393887	VTN,C3,YWHAE,SERPING1,SERPINB3,A2M,SERPINB13,ANXA2,AGT,GSN,AHSG
GO:0002252	immune effector process	15	969	0.81	2.62e-06	9606.ENSP00000215754,9606.ENSP00000245907,9606.ENSP00000259396,9606.ENSP00000263238,9606.ENSP00000278407,9606.ENSP00000280357,9606.ENSP00000283752,9606.ENSP00000296370,9606.ENSP00000320171,9606.ENSP00000345672,9606.ENSP00000346032,9606.ENSP00000359991,9606.ENSP00000362924,9606.ENSP00000379191,9606.ENSP00000393887	MIF,C3,ORM1,ACTR3,SERPING1,IL18,SERPINB3,S100P,PKM,CTSB,ANXA2,PGAM1,GSN,CD59,AHSG
GO:0048518	positive regulation of biological process	34	6112	0.36	4.61e-06	9606.ENSP00000215754,9606.ENSP00000222553,9606.ENSP00000226218,9606.ENSP00000245907,9606.ENSP00000251595,9606.ENSP00000252699,9606.ENSP00000259396,9606.ENSP00000262030,9606.ENSP00000263238,9606.ENSP00000264335,9606.ENSP00000278407,9606.ENSP00000280357,9606.ENSP00000283752,9606.ENSP00000290378,9606.ENSP00000296503,9606.ENSP00000300289,9606.ENSP00000306099,9606.ENSP00000306361,9606.ENSP00000320171,…	MIF,NAMPT,VTN,C3,HBA2,ACTN4,ORM1,ATP5B,ACTR3,YWHAE,SERPING1,IL18,SERPINB3,ACTC1,HMGB2,PDIA3,FGB,FGA,PKM,FGG,ANXA2,AGT,ACTA1,PGK1,GSN,KLK6,YWHAQ,ACTG2,AHSG,ACTA2,MUC5B,LDHA,SOD2,CRABP2
GO:0072378	blood coagulation, fibrin clot formation	5	26	1.9	5.15e-06	9606.ENSP00000278407,9606.ENSP00000306099,9606.ENSP00000306361,9606.ENSP00000323929,9606.ENSP00000336829	SERPING1,FGB,FGA,A2M,FGG
GO:0002376	immune system process	22	2481	0.57	5.54e-06	9606.ENSP00000215754,9606.ENSP00000222553,9606.ENSP00000226218,9606.ENSP00000245907,9606.ENSP00000259396,9606.ENSP00000263238,9606.ENSP00000278407,9606.ENSP00000280357,9606.ENSP00000283752,9606.ENSP00000296370,9606.ENSP00000296503,9606.ENSP00000300289,9606.ENSP00000306099,9606.ENSP00000306361,9606.ENSP00000320171,9606.ENSP00000345672,9606.ENSP00000346032,9606.ENSP00000359991,9606.ENSP00000362924,…	MIF,NAMPT,VTN,C3,ORM1,ACTR3,SERPING1,IL18,SERPINB3,S100P,HMGB2,PDIA3,FGB,FGA,PKM,CTSB,ANXA2,PGAM1,GSN,CD59,AHSG,MUC5B
GO:0010941	regulation of cell death	18	1696	0.65	1.28e-05	9606.ENSP00000215754,9606.ENSP00000251595,9606.ENSP00000252699,9606.ENSP00000264335,9606.ENSP00000290378,9606.ENSP00000296503,9606.ENSP00000300289,9606.ENSP00000306099,9606.ENSP00000306361,9606.ENSP00000336829,9606.ENSP00000341584,9606.ENSP00000345672,9606.ENSP00000355627,9606.ENSP00000362924,9606.ENSP00000371267,9606.ENSP00000377833,9606.ENSP00000445175,9606.ENSP00000446252	MIF,HBA2,ACTN4,YWHAE,ACTC1,HMGB2,PDIA3,FGB,FGA,FGG,SERPINB13,CTSB,AGT,GSN,YWHAQ,ANXA4,LDHA,SOD2
GO:0031639	plasminogen activation	4	11	2.18	1.54e-05	9606.ENSP00000306099,9606.ENSP00000306361,9606.ENSP00000336829,9606.ENSP00000362413	FGB,FGA,FGG,PGK1
GO:0065008	regulation of biological quality	27	4042	0.44	1.54e-05	9606.ENSP00000215754,9606.ENSP00000222553,9606.ENSP00000226218,9606.ENSP00000245907,9606.ENSP00000262030,9606.ENSP00000263238,9606.ENSP00000263867,9606.ENSP00000264335,9606.ENSP00000264613,9606.ENSP00000278407,9606.ENSP00000280357,9606.ENSP00000296503,9606.ENSP00000300289,9606.ENSP00000306099,9606.ENSP00000306361,9606.ENSP00000323929,9606.ENSP00000336829,9606.ENSP00000345672,9606.ENSP00000346032,…	MIF,NAMPT,VTN,C3,ATP5B,ACTR3,CAPG,YWHAE,CP,SERPING1,IL18,HMGB2,PDIA3,FGB,FGA,A2M,FGG,CTSB,ANXA2,AGT,GSN,KLK6,YWHAQ,CD59,ACTA2,SOD2,CRABP2
GO:0006950	response to stress	25	3485	0.48	1.79e-05	9606.ENSP00000215754,9606.ENSP00000222553,9606.ENSP00000245907,9606.ENSP00000251595,9606.ENSP00000252699,9606.ENSP00000259396,9606.ENSP00000263238,9606.ENSP00000264335,9606.ENSP00000278407,9606.ENSP00000280357,9606.ENSP00000296503,9606.ENSP00000300289,9606.ENSP00000306099,9606.ENSP00000306361,9606.ENSP00000320171,9606.ENSP00000323929,9606.ENSP00000336829,9606.ENSP00000355627,9606.ENSP00000362413,…	MIF,NAMPT,C3,HBA2,ACTN4,ORM1,ACTR3,YWHAE,SERPING1,IL18,HMGB2,PDIA3,FGB,FGA,PKM,A2M,FGG,AGT,PGK1,GSN,KLK6,CD59,AHSG,LDHA,SOD2
GO:0042981	regulation of apoptotic process	17	1550	0.66	2.04e-05	9606.ENSP00000215754,9606.ENSP00000252699,9606.ENSP00000264335,9606.ENSP00000290378,9606.ENSP00000296503,9606.ENSP00000300289,9606.ENSP00000306099,9606.ENSP00000306361,9606.ENSP00000336829,9606.ENSP00000341584,9606.ENSP00000345672,9606.ENSP00000355627,9606.ENSP00000362924,9606.ENSP00000371267,9606.ENSP00000377833,9606.ENSP00000445175,9606.ENSP00000446252	MIF,ACTN4,YWHAE,ACTC1,HMGB2,PDIA3,FGB,FGA,FGG,SERPINB13,CTSB,AGT,GSN,YWHAQ,ANXA4,LDHA,SOD2
GO:0032101	regulation of response to external stimulus	14	1013	0.76	2.42e-05	9606.ENSP00000215754,9606.ENSP00000226218,9606.ENSP00000245907,9606.ENSP00000278407,9606.ENSP00000280357,9606.ENSP00000296503,9606.ENSP00000306099,9606.ENSP00000306361,9606.ENSP00000323929,9606.ENSP00000336829,9606.ENSP00000346032,9606.ENSP00000355627,9606.ENSP00000393887,9606.ENSP00000436812	MIF,VTN,C3,SERPING1,IL18,HMGB2,FGB,FGA,A2M,FGG,ANXA2,AGT,AHSG,MUC5B
GO:0006810	transport	27	4353	0.41	6.18e-05	9606.ENSP00000215754,9606.ENSP00000226218,9606.ENSP00000245907,9606.ENSP00000251595,9606.ENSP00000252699,9606.ENSP00000259396,9606.ENSP00000262030,9606.ENSP00000263238,9606.ENSP00000264335,9606.ENSP00000264613,9606.ENSP00000278407,9606.ENSP00000283752,9606.ENSP00000296370,9606.ENSP00000306099,9606.ENSP00000306361,9606.ENSP00000320171,9606.ENSP00000323929,9606.ENSP00000336829,9606.ENSP00000345672,…	MIF,VTN,C3,HBA2,ACTN4,ORM1,ATP5B,ACTR3,YWHAE,CP,SERPING1,SERPINB3,S100P,FGB,FGA,PKM,A2M,FGG,CTSB,ANXA2,AGT,PGAM1,GSN,YWHAQ,CD59,AHSG,GC
GO:0051239	regulation of multicellular organismal process	23	3227	0.47	8.46e-05	9606.ENSP00000215754,9606.ENSP00000226218,9606.ENSP00000245907,9606.ENSP00000259396,9606.ENSP00000262030,9606.ENSP00000264335,9606.ENSP00000278407,9606.ENSP00000280357,9606.ENSP00000283752,9606.ENSP00000296503,9606.ENSP00000306099,9606.ENSP00000306361,9606.ENSP00000320171,9606.ENSP00000336829,9606.ENSP00000341584,9606.ENSP00000346032,9606.ENSP00000355627,9606.ENSP00000362413,9606.ENSP00000366047,…	MIF,VTN,C3,ORM1,ATP5B,YWHAE,SERPING1,IL18,SERPINB3,HMGB2,FGB,FGA,PKM,FGG,SERPINB13,ANXA2,AGT,PGK1,KLK6,ANXA4,AHSG,SOD2,CRABP2
GO:0048583	regulation of response to stimulus	26	4114	0.42	8.6e-05	9606.ENSP00000215754,9606.ENSP00000222553,9606.ENSP00000226218,9606.ENSP00000245907,9606.ENSP00000252699,9606.ENSP00000263238,9606.ENSP00000264335,9606.ENSP00000278407,9606.ENSP00000280357,9606.ENSP00000283752,9606.ENSP00000296503,9606.ENSP00000300289,9606.ENSP00000306099,9606.ENSP00000306361,9606.ENSP00000323929,9606.ENSP00000336829,9606.ENSP00000346032,9606.ENSP00000355627,9606.ENSP00000362924,…	MIF,NAMPT,VTN,C3,ACTN4,ACTR3,YWHAE,SERPING1,IL18,SERPINB3,HMGB2,PDIA3,FGB,FGA,A2M,FGG,ANXA2,AGT,GSN,KLK6,YWHAQ,CD59,AHSG,MUC5B,SOD2,CRABP2
GO:0030449	regulation of complement activation	5	56	1.57	0.0001	9606.ENSP00000226218,9606.ENSP00000245907,9606.ENSP00000278407,9606.ENSP00000323929,9606.ENSP00000379191	VTN,C3,SERPING1,A2M,CD59
GO:0090066	regulation of anatomical structure size	10	516	0.91	0.00011	9606.ENSP00000263238,9606.ENSP00000263867,9606.ENSP00000306099,9606.ENSP00000306361,9606.ENSP00000336829,9606.ENSP00000355627,9606.ENSP00000362924,9606.ENSP00000402373,9606.ENSP00000446252,9606.ENSP00000482841	ACTR3,CAPG,FGB,FGA,FGG,AGT,GSN,ACTA2,SOD2,CRABP2
GO:0008015	blood circulation	9	394	0.98	0.00012	9606.ENSP00000222553,9606.ENSP00000278407,9606.ENSP00000290378,9606.ENSP00000306099,9606.ENSP00000306361,9606.ENSP00000336829,9606.ENSP00000355627,9606.ENSP00000402373,9606.ENSP00000446252	NAMPT,SERPING1,ACTC1,FGB,FGA,FGG,AGT,ACTA2,SOD2
GO:0097746	regulation of blood vessel diameter	6	139	1.25	0.00034	9606.ENSP00000306099,9606.ENSP00000306361,9606.ENSP00000336829,9606.ENSP00000355627,9606.ENSP00000402373,9606.ENSP00000446252	FGB,FGA,FGG,AGT,ACTA2,SOD2
GO:0051050	positive regulation of transport	12	923	0.73	0.00036	9606.ENSP00000215754,9606.ENSP00000226218,9606.ENSP00000245907,9606.ENSP00000252699,9606.ENSP00000264335,9606.ENSP00000306099,9606.ENSP00000306361,9606.ENSP00000336829,9606.ENSP00000346032,9606.ENSP00000355627,9606.ENSP00000371267,9606.ENSP00000393887	MIF,VTN,C3,ACTN4,YWHAE,FGB,FGA,FGG,ANXA2,AGT,YWHAQ,AHSG
GO:0032502	developmental process	30	5841	0.33	0.00039	9606.ENSP00000215754,9606.ENSP00000222553,9606.ENSP00000226218,9606.ENSP00000245907,9606.ENSP00000262030,9606.ENSP00000263867,9606.ENSP00000264335,9606.ENSP00000278407,9606.ENSP00000280357,9606.ENSP00000290378,9606.ENSP00000296503,9606.ENSP00000320171,9606.ENSP00000323929,9606.ENSP00000336829,9606.ENSP00000345672,9606.ENSP00000346032,9606.ENSP00000355627,9606.ENSP00000355645,9606.ENSP00000362413,…	MIF,NAMPT,VTN,C3,ATP5B,CAPG,YWHAE,SERPING1,IL18,ACTC1,HMGB2,PKM,A2M,FGG,CTSB,ANXA2,AGT,ACTA1,PGK1,GSN,KLK6,YWHAQ,ANXA4,ACTG2,AHSG,ACTA2,LDHA,SOD2,MYL6,CRABP2
GO:0048584	positive regulation of response to stimulus	18	2257	0.52	0.00054	9606.ENSP00000215754,9606.ENSP00000226218,9606.ENSP00000245907,9606.ENSP00000252699,9606.ENSP00000263238,9606.ENSP00000264335,9606.ENSP00000278407,9606.ENSP00000280357,9606.ENSP00000296503,9606.ENSP00000300289,9606.ENSP00000306099,9606.ENSP00000306361,9606.ENSP00000336829,9606.ENSP00000355627,9606.ENSP00000362924,9606.ENSP00000366047,9606.ENSP00000371267,9606.ENSP00000436812	MIF,VTN,C3,ACTN4,ACTR3,YWHAE,SERPING1,IL18,HMGB2,PDIA3,FGB,FGA,FGG,AGT,GSN,KLK6,YWHAQ,MUC5B
GO:0032102	negative regulation of response to external stimulus	8	367	0.96	0.00064	9606.ENSP00000215754,9606.ENSP00000226218,9606.ENSP00000278407,9606.ENSP00000306099,9606.ENSP00000306361,9606.ENSP00000323929,9606.ENSP00000336829,9606.ENSP00000346032	MIF,VTN,SERPING1,FGB,FGA,A2M,FGG,ANXA2
GO:0043086	negative regulation of catalytic activity	11	807	0.75	0.00064	9606.ENSP00000226218,9606.ENSP00000245907,9606.ENSP00000264335,9606.ENSP00000278407,9606.ENSP00000283752,9606.ENSP00000323929,9606.ENSP00000341584,9606.ENSP00000346032,9606.ENSP00000355627,9606.ENSP00000377833,9606.ENSP00000393887	VTN,C3,YWHAE,SERPING1,SERPINB3,A2M,SERPINB13,ANXA2,AGT,ANXA4,AHSG
GO:0051258	protein polymerization	5	87	1.38	0.00064	9606.ENSP00000226218,9606.ENSP00000306099,9606.ENSP00000306361,9606.ENSP00000336829,9606.ENSP00000362924	VTN,FGB,FGA,FGG,GSN
GO:1904035	regulation of epithelial cell apoptotic process	5	87	1.38	0.00064	9606.ENSP00000306099,9606.ENSP00000306361,9606.ENSP00000336829,9606.ENSP00000341584,9606.ENSP00000362924	FGB,FGA,FGG,SERPINB13,GSN
GO:2001236	regulation of extrinsic apoptotic signaling pathway	6	161	1.19	0.00064	9606.ENSP00000296503,9606.ENSP00000300289,9606.ENSP00000306099,9606.ENSP00000306361,9606.ENSP00000336829,9606.ENSP00000355627	HMGB2,PDIA3,FGB,FGA,FGG,AGT
GO:1902042	negative regulation of extrinsic apoptotic signaling pathway via death domain receptors	4	39	1.63	0.00075	9606.ENSP00000296503,9606.ENSP00000306099,9606.ENSP00000306361,9606.ENSP00000336829	HMGB2,FGB,FGA,FGG
GO:0006096	glycolytic process	4	40	1.62	0.0008	9606.ENSP00000320171,9606.ENSP00000359991,9606.ENSP00000362413,9606.ENSP00000445175	PKM,PGAM1,PGK1,LDHA
GO:0045916	negative regulation of complement activation	3	10	2.1	0.0008	9606.ENSP00000278407,9606.ENSP00000323929,9606.ENSP00000379191	SERPING1,A2M,CD59
GO:0048585	negative regulation of response to stimulus	15	1636	0.58	0.00085	9606.ENSP00000215754,9606.ENSP00000222553,9606.ENSP00000226218,9606.ENSP00000278407,9606.ENSP00000283752,9606.ENSP00000296503,9606.ENSP00000306099,9606.ENSP00000306361,9606.ENSP00000323929,9606.ENSP00000336829,9606.ENSP00000346032,9606.ENSP00000355627,9606.ENSP00000379191,9606.ENSP00000393887,9606.ENSP00000446252	MIF,NAMPT,VTN,SERPING1,SERPINB3,HMGB2,FGB,FGA,A2M,FGG,ANXA2,AGT,CD59,AHSG,SOD2
GO:0090130	tissue migration	5	95	1.34	0.00085	9606.ENSP00000290378,9606.ENSP00000296370,9606.ENSP00000355645,9606.ENSP00000386857,9606.ENSP00000402373	ACTC1,S100P,ACTA1,ACTG2,ACTA2
GO:0048519	negative regulation of biological process	28	5389	0.34	0.0009	9606.ENSP00000215754,9606.ENSP00000222553,9606.ENSP00000226218,9606.ENSP00000245907,9606.ENSP00000252699,9606.ENSP00000259396,9606.ENSP00000262030,9606.ENSP00000263867,9606.ENSP00000264335,9606.ENSP00000278407,9606.ENSP00000280357,9606.ENSP00000283752,9606.ENSP00000290378,9606.ENSP00000296503,9606.ENSP00000306099,9606.ENSP00000306361,9606.ENSP00000323929,9606.ENSP00000336829,9606.ENSP00000341584,…	MIF,NAMPT,VTN,C3,ACTN4,ORM1,ATP5B,CAPG,YWHAE,SERPING1,IL18,SERPINB3,ACTC1,HMGB2,FGB,FGA,A2M,FGG,SERPINB13,ANXA2,AGT,PGK1,GSN,YWHAQ,ANXA4,CD59,AHSG,SOD2
GO:1904036	negative regulation of epithelial cell apoptotic process	4	42	1.6	0.0009	9606.ENSP00000306099,9606.ENSP00000306361,9606.ENSP00000336829,9606.ENSP00000341584	FGB,FGA,FGG,SERPINB13
GO:0050793	regulation of developmental process	19	2648	0.48	0.00099	9606.ENSP00000215754,9606.ENSP00000222553,9606.ENSP00000245907,9606.ENSP00000252699,9606.ENSP00000280357,9606.ENSP00000283752,9606.ENSP00000296503,9606.ENSP00000306099,9606.ENSP00000306361,9606.ENSP00000320171,9606.ENSP00000336829,9606.ENSP00000341584,9606.ENSP00000346032,9606.ENSP00000355627,9606.ENSP00000362413,9606.ENSP00000366047,9606.ENSP00000393887,9606.ENSP00000446252,9606.ENSP00000482841	MIF,NAMPT,C3,ACTN4,IL18,SERPINB3,HMGB2,FGB,FGA,PKM,FGG,SERPINB13,ANXA2,AGT,PGK1,KLK6,AHSG,SOD2,CRABP2
GO:0019674	NAD metabolic process	4	45	1.57	0.0011	9606.ENSP00000320171,9606.ENSP00000359991,9606.ENSP00000362413,9606.ENSP00000445175	PKM,PGAM1,PGK1,LDHA
GO:0003012	muscle system process	7	297	0.99	0.0014	9606.ENSP00000290378,9606.ENSP00000355627,9606.ENSP00000355645,9606.ENSP00000362924,9606.ENSP00000386857,9606.ENSP00000402373,9606.ENSP00000446955	ACTC1,AGT,ACTA1,GSN,ACTG2,ACTA2,MYL6
GO:0010033	response to organic substance	20	3011	0.44	0.0015	9606.ENSP00000215754,9606.ENSP00000222553,9606.ENSP00000252699,9606.ENSP00000262030,9606.ENSP00000263238,9606.ENSP00000280357,9606.ENSP00000290378,9606.ENSP00000296370,9606.ENSP00000296503,9606.ENSP00000300289,9606.ENSP00000306099,9606.ENSP00000320171,9606.ENSP00000336829,9606.ENSP00000345672,9606.ENSP00000346032,9606.ENSP00000355627,9606.ENSP00000355645,9606.ENSP00000362924,9606.ENSP00000445175,…	MIF,NAMPT,ACTN4,ATP5B,ACTR3,IL18,ACTC1,S100P,HMGB2,PDIA3,FGB,PKM,FGG,CTSB,ANXA2,AGT,ACTA1,GSN,LDHA,SOD2
GO:0051248	negative regulation of protein metabolic process	12	1096	0.66	0.0015	9606.ENSP00000215754,9606.ENSP00000226218,9606.ENSP00000245907,9606.ENSP00000264335,9606.ENSP00000278407,9606.ENSP00000283752,9606.ENSP00000306361,9606.ENSP00000323929,9606.ENSP00000341584,9606.ENSP00000346032,9606.ENSP00000355627,9606.ENSP00000393887	MIF,VTN,C3,YWHAE,SERPING1,SERPINB3,FGA,A2M,SERPINB13,ANXA2,AGT,AHSG
GO:0051179	localization	28	5591	0.32	0.0017	9606.ENSP00000215754,9606.ENSP00000226218,9606.ENSP00000245907,9606.ENSP00000251595,9606.ENSP00000252699,9606.ENSP00000259396,9606.ENSP00000262030,9606.ENSP00000263238,9606.ENSP00000264335,9606.ENSP00000264613,9606.ENSP00000278407,9606.ENSP00000283752,9606.ENSP00000296370,9606.ENSP00000296503,9606.ENSP00000306099,9606.ENSP00000306361,9606.ENSP00000320171,9606.ENSP00000323929,9606.ENSP00000336829,…	MIF,VTN,C3,HBA2,ACTN4,ORM1,ATP5B,ACTR3,YWHAE,CP,SERPING1,SERPINB3,S100P,HMGB2,FGB,FGA,PKM,A2M,FGG,CTSB,ANXA2,AGT,PGAM1,GSN,YWHAQ,CD59,AHSG,GC
GO:0051240	positive regulation of multicellular organismal process	15	1770	0.55	0.0019	9606.ENSP00000215754,9606.ENSP00000245907,9606.ENSP00000259396,9606.ENSP00000262030,9606.ENSP00000280357,9606.ENSP00000283752,9606.ENSP00000296503,9606.ENSP00000306099,9606.ENSP00000306361,9606.ENSP00000320171,9606.ENSP00000336829,9606.ENSP00000346032,9606.ENSP00000355627,9606.ENSP00000446252,9606.ENSP00000482841	MIF,C3,ORM1,ATP5B,IL18,SERPINB3,HMGB2,FGB,FGA,PKM,FGG,ANXA2,AGT,SOD2,CRABP2
GO:1900024	regulation of substrate adhesion-dependent cell spreading	4	53	1.5	0.0019	9606.ENSP00000252699,9606.ENSP00000306099,9606.ENSP00000306361,9606.ENSP00000336829	ACTN4,FGB,FGA,FGG
GO:0034116	positive regulation of heterotypic cell-cell adhesion	3	16	1.89	0.0021	9606.ENSP00000306099,9606.ENSP00000306361,9606.ENSP00000336829	FGB,FGA,FGG
GO:0009966	regulation of signal transduction	20	3107	0.43	0.0022	9606.ENSP00000215754,9606.ENSP00000226218,9606.ENSP00000245907,9606.ENSP00000252699,9606.ENSP00000264335,9606.ENSP00000280357,9606.ENSP00000283752,9606.ENSP00000296503,9606.ENSP00000300289,9606.ENSP00000306099,9606.ENSP00000306361,9606.ENSP00000323929,9606.ENSP00000336829,9606.ENSP00000355627,9606.ENSP00000362924,9606.ENSP00000366047,9606.ENSP00000371267,9606.ENSP00000393887,9606.ENSP00000446252,…	MIF,VTN,C3,ACTN4,YWHAE,IL18,SERPINB3,HMGB2,PDIA3,FGB,FGA,A2M,FGG,AGT,GSN,KLK6,YWHAQ,AHSG,SOD2,CRABP2
GO:0060255	regulation of macromolecule metabolic process	30	6407	0.29	0.0022	9606.ENSP00000215754,9606.ENSP00000222553,9606.ENSP00000226218,9606.ENSP00000245907,9606.ENSP00000252699,9606.ENSP00000259396,9606.ENSP00000263238,9606.ENSP00000264335,9606.ENSP00000278407,9606.ENSP00000280357,9606.ENSP00000283752,9606.ENSP00000290378,9606.ENSP00000296503,9606.ENSP00000306099,9606.ENSP00000306361,9606.ENSP00000323929,9606.ENSP00000336829,9606.ENSP00000341584,9606.ENSP00000346032,…	MIF,NAMPT,VTN,C3,ACTN4,ORM1,ACTR3,YWHAE,SERPING1,IL18,SERPINB3,ACTC1,HMGB2,FGB,FGA,A2M,FGG,SERPINB13,ANXA2,AGT,ACTA1,PGAM1,GSN,YWHAQ,ANXA4,ACTG2,AHSG,ACTA2,SOD2,CRABP2
GO:0019229	regulation of vasoconstriction	4	59	1.45	0.0026	9606.ENSP00000306099,9606.ENSP00000306361,9606.ENSP00000336829,9606.ENSP00000355627	FGB,FGA,FGG,AGT
GO:0023056	positive regulation of signaling	15	1831	0.53	0.0026	9606.ENSP00000215754,9606.ENSP00000226218,9606.ENSP00000245907,9606.ENSP00000252699,9606.ENSP00000264335,9606.ENSP00000280357,9606.ENSP00000300289,9606.ENSP00000306099,9606.ENSP00000306361,9606.ENSP00000336829,9606.ENSP00000346032,9606.ENSP00000355627,9606.ENSP00000362924,9606.ENSP00000366047,9606.ENSP00000371267	MIF,VTN,C3,ACTN4,YWHAE,IL18,PDIA3,FGB,FGA,FGG,ANXA2,AGT,GSN,KLK6,YWHAQ
GO:0071310	cellular response to organic substance	17	2369	0.48	0.0031	9606.ENSP00000215754,9606.ENSP00000222553,9606.ENSP00000252699,9606.ENSP00000262030,9606.ENSP00000263238,9606.ENSP00000280357,9606.ENSP00000296503,9606.ENSP00000300289,9606.ENSP00000306099,9606.ENSP00000320171,9606.ENSP00000336829,9606.ENSP00000345672,9606.ENSP00000346032,9606.ENSP00000355627,9606.ENSP00000355645,9606.ENSP00000362924,9606.ENSP00000446252	MIF,NAMPT,ACTN4,ATP5B,ACTR3,IL18,HMGB2,PDIA3,FGB,PKM,FGG,CTSB,ANXA2,AGT,ACTA1,GSN,SOD2
GO:0032501	multicellular organismal process	31	6933	0.27	0.0032	9606.ENSP00000222553,9606.ENSP00000226218,9606.ENSP00000245907,9606.ENSP00000262030,9606.ENSP00000263867,9606.ENSP00000264335,9606.ENSP00000278407,9606.ENSP00000280357,9606.ENSP00000290378,9606.ENSP00000296370,9606.ENSP00000296503,9606.ENSP00000306099,9606.ENSP00000306361,9606.ENSP00000320171,9606.ENSP00000323929,9606.ENSP00000336829,9606.ENSP00000345672,9606.ENSP00000346032,9606.ENSP00000355627,…	NAMPT,VTN,C3,ATP5B,CAPG,YWHAE,SERPING1,IL18,ACTC1,S100P,HMGB2,FGB,FGA,PKM,A2M,FGG,CTSB,ANXA2,AGT,ACTA1,GSN,KLK6,YWHAQ,CD59,ACTG2,AHSG,ACTA2,LDHA,SOD2,MYL6,CRABP2
GO:0070887	cellular response to chemical stimulus	19	2919	0.43	0.0032	9606.ENSP00000215754,9606.ENSP00000222553,9606.ENSP00000251595,9606.ENSP00000252699,9606.ENSP00000262030,9606.ENSP00000263238,9606.ENSP00000280357,9606.ENSP00000296503,9606.ENSP00000300289,9606.ENSP00000306099,9606.ENSP00000320171,9606.ENSP00000336829,9606.ENSP00000345672,9606.ENSP00000346032,9606.ENSP00000355627,9606.ENSP00000355645,9606.ENSP00000362413,9606.ENSP00000362924,9606.ENSP00000446252	MIF,NAMPT,HBA2,ACTN4,ATP5B,ACTR3,IL18,HMGB2,PDIA3,FGB,PKM,FGG,CTSB,ANXA2,AGT,ACTA1,PGK1,GSN,SOD2
GO:0019222	regulation of metabolic process	31	6948	0.27	0.0033	9606.ENSP00000215754,9606.ENSP00000222553,9606.ENSP00000226218,9606.ENSP00000245907,9606.ENSP00000252699,9606.ENSP00000259396,9606.ENSP00000263238,9606.ENSP00000264335,9606.ENSP00000278407,9606.ENSP00000280357,9606.ENSP00000283752,9606.ENSP00000290378,9606.ENSP00000296503,9606.ENSP00000306099,9606.ENSP00000306361,9606.ENSP00000323929,9606.ENSP00000336829,9606.ENSP00000341584,9606.ENSP00000346032,…	MIF,NAMPT,VTN,C3,ACTN4,ORM1,ACTR3,YWHAE,SERPING1,IL18,SERPINB3,ACTC1,HMGB2,FGB,FGA,A2M,FGG,SERPINB13,ANXA2,AGT,ACTA1,PGAM1,PGK1,GSN,YWHAQ,ANXA4,ACTG2,AHSG,ACTA2,SOD2,CRABP2
GO:0050789	regulation of biological process	41	11475	0.17	0.0033	9606.ENSP00000215754,9606.ENSP00000222553,9606.ENSP00000226218,9606.ENSP00000245907,9606.ENSP00000251595,9606.ENSP00000252699,9606.ENSP00000259396,9606.ENSP00000262030,9606.ENSP00000263238,9606.ENSP00000263867,9606.ENSP00000264335,9606.ENSP00000278407,9606.ENSP00000280357,9606.ENSP00000283752,9606.ENSP00000290378,9606.ENSP00000296503,9606.ENSP00000300289,9606.ENSP00000306099,9606.ENSP00000306361,…	MIF,NAMPT,VTN,C3,HBA2,ACTN4,ORM1,ATP5B,ACTR3,CAPG,YWHAE,SERPING1,IL18,SERPINB3,ACTC1,HMGB2,PDIA3,FGB,FGA,PKM,A2M,FGG,SERPINB13,CTSB,ANXA2,AGT,ACTA1,PGAM1,PGK1,GSN,KLK6,YWHAQ,ANXA4,CD59,ACTG2,AHSG,ACTA2,MUC5B,LDHA,SOD2,CRABP2
GO:2001234	negative regulation of apoptotic signaling pathway	6	232	1.03	0.0033	9606.ENSP00000215754,9606.ENSP00000296503,9606.ENSP00000306099,9606.ENSP00000306361,9606.ENSP00000336829,9606.ENSP00000446252	MIF,HMGB2,FGB,FGA,FGG,SOD2
GO:0009967	positive regulation of signal transduction	14	1654	0.55	0.0034	9606.ENSP00000215754,9606.ENSP00000226218,9606.ENSP00000245907,9606.ENSP00000252699,9606.ENSP00000264335,9606.ENSP00000280357,9606.ENSP00000300289,9606.ENSP00000306099,9606.ENSP00000306361,9606.ENSP00000336829,9606.ENSP00000355627,9606.ENSP00000362924,9606.ENSP00000366047,9606.ENSP00000371267	MIF,VTN,C3,ACTN4,YWHAE,IL18,PDIA3,FGB,FGA,FGG,AGT,GSN,KLK6,YWHAQ
GO:0071345	cellular response to cytokine stimulus	11	1013	0.66	0.0034	9606.ENSP00000215754,9606.ENSP00000252699,9606.ENSP00000262030,9606.ENSP00000263238,9606.ENSP00000280357,9606.ENSP00000300289,9606.ENSP00000306099,9606.ENSP00000336829,9606.ENSP00000346032,9606.ENSP00000362924,9606.ENSP00000446252	MIF,ACTN4,ATP5B,ACTR3,IL18,PDIA3,FGB,FGG,ANXA2,GSN,SOD2
GO:0023051	regulation of signaling	21	3553	0.39	0.0038	9606.ENSP00000215754,9606.ENSP00000226218,9606.ENSP00000245907,9606.ENSP00000252699,9606.ENSP00000264335,9606.ENSP00000280357,9606.ENSP00000283752,9606.ENSP00000296503,9606.ENSP00000300289,9606.ENSP00000306099,9606.ENSP00000306361,9606.ENSP00000323929,9606.ENSP00000336829,9606.ENSP00000346032,9606.ENSP00000355627,9606.ENSP00000362924,9606.ENSP00000366047,9606.ENSP00000371267,9606.ENSP00000393887,…	MIF,VTN,C3,ACTN4,YWHAE,IL18,SERPINB3,HMGB2,PDIA3,FGB,FGA,A2M,FGG,ANXA2,AGT,GSN,KLK6,YWHAQ,AHSG,SOD2,CRABP2
GO:0050878	regulation of body fluid levels	8	509	0.82	0.0041	9606.ENSP00000226218,9606.ENSP00000278407,9606.ENSP00000306099,9606.ENSP00000306361,9606.ENSP00000323929,9606.ENSP00000336829,9606.ENSP00000346032,9606.ENSP00000379191	VTN,SERPING1,FGB,FGA,A2M,FGG,ANXA2,CD59
GO:0032269	negative regulation of cellular protein metabolic process	11	1043	0.64	0.0043	9606.ENSP00000215754,9606.ENSP00000226218,9606.ENSP00000245907,9606.ENSP00000264335,9606.ENSP00000278407,9606.ENSP00000283752,9606.ENSP00000323929,9606.ENSP00000341584,9606.ENSP00000346032,9606.ENSP00000355627,9606.ENSP00000393887	MIF,VTN,C3,YWHAE,SERPING1,SERPINB3,A2M,SERPINB13,ANXA2,AGT,AHSG
GO:0006936	muscle contraction	6	248	1	0.0044	9606.ENSP00000290378,9606.ENSP00000355627,9606.ENSP00000355645,9606.ENSP00000386857,9606.ENSP00000402373,9606.ENSP00000446955	ACTC1,AGT,ACTA1,ACTG2,ACTA2,MYL6
GO:0048523	negative regulation of cellular process	25	4874	0.33	0.0044	9606.ENSP00000215754,9606.ENSP00000222553,9606.ENSP00000226218,9606.ENSP00000245907,9606.ENSP00000252699,9606.ENSP00000262030,9606.ENSP00000263867,9606.ENSP00000264335,9606.ENSP00000278407,9606.ENSP00000280357,9606.ENSP00000283752,9606.ENSP00000290378,9606.ENSP00000296503,9606.ENSP00000306099,9606.ENSP00000306361,9606.ENSP00000323929,9606.ENSP00000336829,9606.ENSP00000341584,9606.ENSP00000346032,…	MIF,NAMPT,VTN,C3,ACTN4,ATP5B,CAPG,YWHAE,SERPING1,IL18,SERPINB3,ACTC1,HMGB2,FGB,FGA,A2M,FGG,SERPINB13,ANXA2,AGT,GSN,YWHAQ,ANXA4,AHSG,SOD2
GO:0048522	positive regulation of cellular process	27	5579	0.3	0.0045	9606.ENSP00000215754,9606.ENSP00000222553,9606.ENSP00000226218,9606.ENSP00000245907,9606.ENSP00000251595,9606.ENSP00000252699,9606.ENSP00000262030,9606.ENSP00000263238,9606.ENSP00000264335,9606.ENSP00000280357,9606.ENSP00000283752,9606.ENSP00000296503,9606.ENSP00000300289,9606.ENSP00000306099,9606.ENSP00000306361,9606.ENSP00000336829,9606.ENSP00000346032,9606.ENSP00000355627,9606.ENSP00000362413,…	MIF,NAMPT,VTN,C3,HBA2,ACTN4,ATP5B,ACTR3,YWHAE,IL18,SERPINB3,HMGB2,PDIA3,FGB,FGA,FGG,ANXA2,AGT,PGK1,GSN,KLK6,YWHAQ,AHSG,ACTA2,LDHA,SOD2,CRABP2
GO:0065007	biological regulation	42	12171	0.16	0.0045	9606.ENSP00000215754,9606.ENSP00000222553,9606.ENSP00000226218,9606.ENSP00000245907,9606.ENSP00000251595,9606.ENSP00000252699,9606.ENSP00000259396,9606.ENSP00000262030,9606.ENSP00000263238,9606.ENSP00000263867,9606.ENSP00000264335,9606.ENSP00000264613,9606.ENSP00000278407,9606.ENSP00000280357,9606.ENSP00000283752,9606.ENSP00000290378,9606.ENSP00000296503,9606.ENSP00000300289,9606.ENSP00000306099,…	MIF,NAMPT,VTN,C3,HBA2,ACTN4,ORM1,ATP5B,ACTR3,CAPG,YWHAE,CP,SERPING1,IL18,SERPINB3,ACTC1,HMGB2,PDIA3,FGB,FGA,PKM,A2M,FGG,SERPINB13,CTSB,ANXA2,AGT,ACTA1,PGAM1,PGK1,GSN,KLK6,YWHAQ,ANXA4,CD59,ACTG2,AHSG,ACTA2,MUC5B,LDHA,SOD2,CRABP2
GO:0001869	negative regulation of complement activation, lectin pathway	2	2	2.62	0.0046	9606.ENSP00000278407,9606.ENSP00000323929	SERPING1,A2M
GO:0007015	actin filament organization	6	254	0.99	0.0047	9606.ENSP00000252699,9606.ENSP00000263238,9606.ENSP00000263867,9606.ENSP00000290378,9606.ENSP00000355645,9606.ENSP00000362924	ACTN4,ACTR3,CAPG,ACTC1,ACTA1,GSN
GO:0051336	regulation of hydrolase activity	12	1284	0.59	0.0053	9606.ENSP00000226218,9606.ENSP00000245907,9606.ENSP00000264335,9606.ENSP00000278407,9606.ENSP00000283752,9606.ENSP00000296503,9606.ENSP00000323929,9606.ENSP00000341584,9606.ENSP00000346032,9606.ENSP00000355627,9606.ENSP00000362924,9606.ENSP00000393887	VTN,C3,YWHAE,SERPING1,SERPINB3,HMGB2,A2M,SERPINB13,ANXA2,AGT,GSN,AHSG
GO:0010035	response to inorganic substance	8	538	0.79	0.0055	9606.ENSP00000251595,9606.ENSP00000306099,9606.ENSP00000306361,9606.ENSP00000336829,9606.ENSP00000355645,9606.ENSP00000362924,9606.ENSP00000445175,9606.ENSP00000446252	HBA2,FGB,FGA,FGG,ACTA1,GSN,LDHA,SOD2
GO:0045087	innate immune response	9	703	0.73	0.0055	9606.ENSP00000215754,9606.ENSP00000245907,9606.ENSP00000263238,9606.ENSP00000278407,9606.ENSP00000280357,9606.ENSP00000296503,9606.ENSP00000306099,9606.ENSP00000306361,9606.ENSP00000362924	MIF,C3,ACTR3,SERPING1,IL18,HMGB2,FGB,FGA,GSN
GO:0006952	defense response	12	1296	0.59	0.0056	9606.ENSP00000215754,9606.ENSP00000222553,9606.ENSP00000245907,9606.ENSP00000259396,9606.ENSP00000263238,9606.ENSP00000278407,9606.ENSP00000280357,9606.ENSP00000296503,9606.ENSP00000306099,9606.ENSP00000306361,9606.ENSP00000362924,9606.ENSP00000393887	MIF,NAMPT,C3,ORM1,ACTR3,SERPING1,IL18,HMGB2,FGB,FGA,GSN,AHSG
GO:0016485	protein processing	5	158	1.12	0.0056	9606.ENSP00000306099,9606.ENSP00000306361,9606.ENSP00000336829,9606.ENSP00000362413,9606.ENSP00000366047	FGB,FGA,FGG,PGK1,KLK6
GO:0043066	negative regulation of apoptotic process	10	893	0.67	0.0057	9606.ENSP00000215754,9606.ENSP00000264335,9606.ENSP00000290378,9606.ENSP00000296503,9606.ENSP00000306099,9606.ENSP00000306361,9606.ENSP00000336829,9606.ENSP00000341584,9606.ENSP00000377833,9606.ENSP00000446252	MIF,YWHAE,ACTC1,HMGB2,FGB,FGA,FGG,SERPINB13,ANXA4,SOD2
GO:0009888	tissue development	14	1760	0.52	0.0058	9606.ENSP00000226218,9606.ENSP00000290378,9606.ENSP00000320171,9606.ENSP00000345672,9606.ENSP00000355627,9606.ENSP00000355645,9606.ENSP00000362413,9606.ENSP00000362924,9606.ENSP00000366047,9606.ENSP00000377833,9606.ENSP00000386857,9606.ENSP00000402373,9606.ENSP00000446955,9606.ENSP00000482841	VTN,ACTC1,PKM,CTSB,AGT,ACTA1,PGK1,GSN,KLK6,ANXA4,ACTG2,ACTA2,MYL6,CRABP2
GO:0050776	regulation of immune response	10	896	0.67	0.0058	9606.ENSP00000215754,9606.ENSP00000226218,9606.ENSP00000245907,9606.ENSP00000263238,9606.ENSP00000278407,9606.ENSP00000280357,9606.ENSP00000296503,9606.ENSP00000323929,9606.ENSP00000379191,9606.ENSP00000436812	MIF,VTN,C3,ACTR3,SERPING1,IL18,HMGB2,A2M,CD59,MUC5B
GO:0042221	response to chemical	23	4333	0.34	0.0061	9606.ENSP00000215754,9606.ENSP00000222553,9606.ENSP00000251595,9606.ENSP00000252699,9606.ENSP00000262030,9606.ENSP00000263238,9606.ENSP00000280357,9606.ENSP00000290378,9606.ENSP00000296370,9606.ENSP00000296503,9606.ENSP00000300289,9606.ENSP00000306099,9606.ENSP00000306361,9606.ENSP00000320171,9606.ENSP00000336829,9606.ENSP00000345672,9606.ENSP00000346032,9606.ENSP00000355627,9606.ENSP00000355645,…	MIF,NAMPT,HBA2,ACTN4,ATP5B,ACTR3,IL18,ACTC1,S100P,HMGB2,PDIA3,FGB,FGA,PKM,FGG,CTSB,ANXA2,AGT,ACTA1,PGK1,GSN,LDHA,SOD2
GO:0060627	regulation of vesicle-mediated transport	8	550	0.78	0.0061	9606.ENSP00000226218,9606.ENSP00000245907,9606.ENSP00000252699,9606.ENSP00000306099,9606.ENSP00000306361,9606.ENSP00000336829,9606.ENSP00000346032,9606.ENSP00000393887	VTN,C3,ACTN4,FGB,FGA,FGG,ANXA2,AHSG
GO:0061621	canonical glycolysis	3	27	1.67	0.0061	9606.ENSP00000320171,9606.ENSP00000359991,9606.ENSP00000362413	PKM,PGAM1,PGK1
GO:0007568	aging	6	274	0.96	0.0063	9606.ENSP00000215754,9606.ENSP00000222553,9606.ENSP00000278407,9606.ENSP00000355627,9606.ENSP00000362924,9606.ENSP00000446252	MIF,NAMPT,SERPING1,AGT,GSN,SOD2
GO:0001969	regulation of activation of membrane attack complex	2	3	2.44	0.0065	9606.ENSP00000245907,9606.ENSP00000379191	C3,CD59
GO:2000352	negative regulation of endothelial cell apoptotic process	3	29	1.63	0.0071	9606.ENSP00000306099,9606.ENSP00000306361,9606.ENSP00000336829	FGB,FGA,FGG
GO:0002697	regulation of immune effector process	7	418	0.84	0.0073	9606.ENSP00000215754,9606.ENSP00000226218,9606.ENSP00000245907,9606.ENSP00000278407,9606.ENSP00000280357,9606.ENSP00000323929,9606.ENSP00000379191	MIF,VTN,C3,SERPING1,IL18,A2M,CD59
GO:0019220	regulation of phosphate metabolic process	14	1816	0.51	0.0073	9606.ENSP00000215754,9606.ENSP00000226218,9606.ENSP00000245907,9606.ENSP00000264335,9606.ENSP00000280357,9606.ENSP00000283752,9606.ENSP00000306099,9606.ENSP00000306361,9606.ENSP00000336829,9606.ENSP00000346032,9606.ENSP00000355627,9606.ENSP00000359991,9606.ENSP00000362413,9606.ENSP00000393887	MIF,VTN,C3,YWHAE,IL18,SERPINB3,FGB,FGA,FGG,ANXA2,AGT,PGAM1,PGK1,AHSG
GO:0022607	cellular component assembly	16	2359	0.45	0.0085	9606.ENSP00000215754,9606.ENSP00000226218,9606.ENSP00000252699,9606.ENSP00000263238,9606.ENSP00000263867,9606.ENSP00000264335,9606.ENSP00000290378,9606.ENSP00000296503,9606.ENSP00000306099,9606.ENSP00000306361,9606.ENSP00000336829,9606.ENSP00000346032,9606.ENSP00000355645,9606.ENSP00000362924,9606.ENSP00000379191,9606.ENSP00000446252	MIF,VTN,ACTN4,ACTR3,CAPG,YWHAE,ACTC1,HMGB2,FGB,FGA,FGG,ANXA2,ACTA1,GSN,CD59,SOD2
GO:2001235	positive regulation of apoptotic signaling pathway	5	180	1.06	0.0087	9606.ENSP00000264335,9606.ENSP00000300289,9606.ENSP00000355627,9606.ENSP00000362924,9606.ENSP00000371267	YWHAE,PDIA3,AGT,GSN,YWHAQ
GO:0045907	positive regulation of vasoconstriction	3	32	1.59	0.0088	9606.ENSP00000306099,9606.ENSP00000306361,9606.ENSP00000336829	FGB,FGA,FGG
GO:0042325	regulation of phosphorylation	13	1626	0.52	0.0094	9606.ENSP00000215754,9606.ENSP00000226218,9606.ENSP00000245907,9606.ENSP00000280357,9606.ENSP00000283752,9606.ENSP00000306099,9606.ENSP00000306361,9606.ENSP00000336829,9606.ENSP00000346032,9606.ENSP00000355627,9606.ENSP00000359991,9606.ENSP00000362413,9606.ENSP00000393887	MIF,VTN,C3,IL18,SERPINB3,FGB,FGA,FGG,ANXA2,AGT,PGAM1,PGK1,AHSG
GO:0050790	regulation of catalytic activity	16	2386	0.45	0.0094	9606.ENSP00000215754,9606.ENSP00000226218,9606.ENSP00000245907,9606.ENSP00000264335,9606.ENSP00000278407,9606.ENSP00000280357,9606.ENSP00000283752,9606.ENSP00000296503,9606.ENSP00000323929,9606.ENSP00000341584,9606.ENSP00000345672,9606.ENSP00000346032,9606.ENSP00000355627,9606.ENSP00000362924,9606.ENSP00000377833,9606.ENSP00000393887	MIF,VTN,C3,YWHAE,SERPING1,IL18,SERPINB3,HMGB2,A2M,SERPINB13,CTSB,ANXA2,AGT,GSN,ANXA4,AHSG
GO:0007596	blood coagulation	6	303	0.92	0.0097	9606.ENSP00000278407,9606.ENSP00000306099,9606.ENSP00000306361,9606.ENSP00000323929,9606.ENSP00000336829,9606.ENSP00000379191	SERPING1,FGB,FGA,A2M,FGG,CD59
GO:0044419	interspecies interaction between organisms	14	1899	0.49	0.0109	9606.ENSP00000215754,9606.ENSP00000245907,9606.ENSP00000263238,9606.ENSP00000264335,9606.ENSP00000278407,9606.ENSP00000280357,9606.ENSP00000283752,9606.ENSP00000296503,9606.ENSP00000306099,9606.ENSP00000306361,9606.ENSP00000345672,9606.ENSP00000346032,9606.ENSP00000362924,9606.ENSP00000402373	MIF,C3,ACTR3,YWHAE,SERPING1,IL18,SERPINB3,HMGB2,FGB,FGA,CTSB,ANXA2,GSN,ACTA2
GO:0009893	positive regulation of metabolic process	21	3893	0.35	0.011	9606.ENSP00000215754,9606.ENSP00000222553,9606.ENSP00000226218,9606.ENSP00000245907,9606.ENSP00000252699,9606.ENSP00000259396,9606.ENSP00000263238,9606.ENSP00000280357,9606.ENSP00000283752,9606.ENSP00000290378,9606.ENSP00000296503,9606.ENSP00000306099,9606.ENSP00000306361,9606.ENSP00000336829,9606.ENSP00000346032,9606.ENSP00000355627,9606.ENSP00000355645,9606.ENSP00000362413,9606.ENSP00000362924,…	MIF,NAMPT,VTN,C3,ACTN4,ORM1,ACTR3,IL18,SERPINB3,ACTC1,HMGB2,FGB,FGA,FGG,ANXA2,AGT,ACTA1,PGK1,GSN,ACTG2,ACTA2
GO:0002224	toll-like receptor signaling pathway	4	100	1.22	0.0116	9606.ENSP00000306099,9606.ENSP00000306361,9606.ENSP00000336829,9606.ENSP00000345672	FGB,FGA,FGG,CTSB
GO:0010604	positive regulation of macromolecule metabolic process	20	3600	0.36	0.0116	9606.ENSP00000215754,9606.ENSP00000222553,9606.ENSP00000226218,9606.ENSP00000245907,9606.ENSP00000252699,9606.ENSP00000259396,9606.ENSP00000263238,9606.ENSP00000280357,9606.ENSP00000283752,9606.ENSP00000290378,9606.ENSP00000296503,9606.ENSP00000306099,9606.ENSP00000306361,9606.ENSP00000336829,9606.ENSP00000346032,9606.ENSP00000355627,9606.ENSP00000355645,9606.ENSP00000362924,9606.ENSP00000386857,…	MIF,NAMPT,VTN,C3,ACTN4,ORM1,ACTR3,IL18,SERPINB3,ACTC1,HMGB2,FGB,FGA,FGG,ANXA2,AGT,ACTA1,GSN,ACTG2,ACTA2
GO:1901564	organonitrogen compound metabolic process	25	5244	0.3	0.0116	9606.ENSP00000222553,9606.ENSP00000245907,9606.ENSP00000262030,9606.ENSP00000264335,9606.ENSP00000264613,9606.ENSP00000278407,9606.ENSP00000280357,9606.ENSP00000300289,9606.ENSP00000306099,9606.ENSP00000306361,9606.ENSP00000311746,9606.ENSP00000320171,9606.ENSP00000323929,9606.ENSP00000336829,9606.ENSP00000345672,9606.ENSP00000346032,9606.ENSP00000355627,9606.ENSP00000359991,9606.ENSP00000362235,…	NAMPT,C3,ATP5B,YWHAE,CP,SERPING1,IL18,PDIA3,FGB,FGA,KLK10,PKM,A2M,FGG,CTSB,ANXA2,AGT,PGAM1,ST6GALNAC6,PGK1,GSN,KLK6,AHSG,MUC5B,LDHA
GO:0045807	positive regulation of endocytosis	4	103	1.21	0.0125	9606.ENSP00000226218,9606.ENSP00000245907,9606.ENSP00000252699,9606.ENSP00000346032	VTN,C3,ACTN4,ANXA2
GO:0030049	muscle filament sliding	3	38	1.52	0.0129	9606.ENSP00000290378,9606.ENSP00000355645,9606.ENSP00000446955	ACTC1,ACTA1,MYL6
GO:1900026	positive regulation of substrate adhesion-dependent cell spreading	3	38	1.52	0.0129	9606.ENSP00000306099,9606.ENSP00000306361,9606.ENSP00000336829	FGB,FGA,FGG
GO:0051241	negative regulation of multicellular organismal process	11	1231	0.57	0.013	9606.ENSP00000226218,9606.ENSP00000259396,9606.ENSP00000278407,9606.ENSP00000306099,9606.ENSP00000306361,9606.ENSP00000336829,9606.ENSP00000346032,9606.ENSP00000355627,9606.ENSP00000362413,9606.ENSP00000377833,9606.ENSP00000393887	VTN,ORM1,SERPING1,FGB,FGA,FGG,ANXA2,AGT,PGK1,ANXA4,AHSG
GO:0046034	ATP metabolic process	5	204	1.01	0.0136	9606.ENSP00000262030,9606.ENSP00000320171,9606.ENSP00000359991,9606.ENSP00000362413,9606.ENSP00000445175	ATP5B,PKM,PGAM1,PGK1,LDHA
GO:0097435	supramolecular fiber organization	7	480	0.78	0.0144	9606.ENSP00000252699,9606.ENSP00000263238,9606.ENSP00000263867,9606.ENSP00000290378,9606.ENSP00000346032,9606.ENSP00000355645,9606.ENSP00000362924	ACTN4,ACTR3,CAPG,ACTC1,ANXA2,ACTA1,GSN
GO:0043152	induction of bacterial agglutination	2	6	2.14	0.015	9606.ENSP00000306099,9606.ENSP00000306361	FGB,FGA
GO:1902172	regulation of keratinocyte apoptotic process	2	6	2.14	0.015	9606.ENSP00000341584,9606.ENSP00000362924	SERPINB13,GSN
GO:0030198	extracellular matrix organization	6	338	0.87	0.0155	9606.ENSP00000226218,9606.ENSP00000306099,9606.ENSP00000306361,9606.ENSP00000323929,9606.ENSP00000336829,9606.ENSP00000346032	VTN,FGB,FGA,A2M,FGG,ANXA2
GO:0010810	regulation of cell-substrate adhesion	5	212	0.99	0.0157	9606.ENSP00000226218,9606.ENSP00000252699,9606.ENSP00000306099,9606.ENSP00000306361,9606.ENSP00000336829	VTN,ACTN4,FGB,FGA,FGG
GO:0070527	platelet aggregation	3	42	1.47	0.016	9606.ENSP00000306099,9606.ENSP00000306361,9606.ENSP00000336829	FGB,FGA,FGG
GO:0002682	regulation of immune system process	12	1514	0.52	0.0176	9606.ENSP00000215754,9606.ENSP00000226218,9606.ENSP00000245907,9606.ENSP00000259396,9606.ENSP00000263238,9606.ENSP00000278407,9606.ENSP00000280357,9606.ENSP00000296503,9606.ENSP00000323929,9606.ENSP00000362924,9606.ENSP00000379191,9606.ENSP00000436812	MIF,VTN,C3,ORM1,ACTR3,SERPING1,IL18,HMGB2,A2M,GSN,CD59,MUC5B
GO:0048856	anatomical structure development	25	5402	0.28	0.0176	9606.ENSP00000226218,9606.ENSP00000245907,9606.ENSP00000262030,9606.ENSP00000263867,9606.ENSP00000264335,9606.ENSP00000280357,9606.ENSP00000290378,9606.ENSP00000296503,9606.ENSP00000320171,9606.ENSP00000336829,9606.ENSP00000345672,9606.ENSP00000346032,9606.ENSP00000355627,9606.ENSP00000355645,9606.ENSP00000362413,9606.ENSP00000362924,9606.ENSP00000366047,9606.ENSP00000371267,9606.ENSP00000377833,…	VTN,C3,ATP5B,CAPG,YWHAE,IL18,ACTC1,HMGB2,PKM,FGG,CTSB,ANXA2,AGT,ACTA1,PGK1,GSN,KLK6,YWHAQ,ANXA4,ACTG2,AHSG,ACTA2,LDHA,MYL6,CRABP2
GO:0031347	regulation of defense response	8	674	0.69	0.0178	9606.ENSP00000245907,9606.ENSP00000278407,9606.ENSP00000280357,9606.ENSP00000296503,9606.ENSP00000323929,9606.ENSP00000355627,9606.ENSP00000393887,9606.ENSP00000436812	C3,SERPING1,IL18,HMGB2,A2M,AGT,AHSG,MUC5B
GO:0051222	positive regulation of protein transport	6	352	0.85	0.0185	9606.ENSP00000215754,9606.ENSP00000264335,9606.ENSP00000306099,9606.ENSP00000306361,9606.ENSP00000336829,9606.ENSP00000371267	MIF,YWHAE,FGB,FGA,FGG,YWHAQ
GO:0021762	substantia nigra development	3	45	1.44	0.0188	9606.ENSP00000264335,9606.ENSP00000371267,9606.ENSP00000445175	YWHAE,YWHAQ,LDHA
GO:0006954	inflammatory response	7	515	0.75	0.0201	9606.ENSP00000215754,9606.ENSP00000222553,9606.ENSP00000245907,9606.ENSP00000259396,9606.ENSP00000280357,9606.ENSP00000296503,9606.ENSP00000393887	MIF,NAMPT,C3,ORM1,IL18,HMGB2,AHSG
GO:0009605	response to external stimulus	15	2310	0.43	0.0201	9606.ENSP00000215754,9606.ENSP00000222553,9606.ENSP00000245907,9606.ENSP00000263238,9606.ENSP00000278407,9606.ENSP00000280357,9606.ENSP00000296503,9606.ENSP00000306099,9606.ENSP00000306361,9606.ENSP00000320171,9606.ENSP00000355627,9606.ENSP00000355645,9606.ENSP00000362924,9606.ENSP00000402373,9606.ENSP00000445175	MIF,NAMPT,C3,ACTR3,SERPING1,IL18,HMGB2,FGB,FGA,PKM,AGT,ACTA1,GSN,ACTA2,LDHA
GO:0030048	actin filament-based movement	4	121	1.14	0.0201	9606.ENSP00000252699,9606.ENSP00000290378,9606.ENSP00000355645,9606.ENSP00000446955	ACTN4,ACTC1,ACTA1,MYL6
GO:0032787	monocarboxylic acid metabolic process	7	515	0.75	0.0201	9606.ENSP00000215754,9606.ENSP00000245907,9606.ENSP00000320171,9606.ENSP00000359991,9606.ENSP00000362413,9606.ENSP00000445175,9606.ENSP00000482841	MIF,C3,PKM,PGAM1,PGK1,LDHA,CRABP2
GO:0048731	system development	22	4426	0.32	0.0201	9606.ENSP00000226218,9606.ENSP00000245907,9606.ENSP00000262030,9606.ENSP00000263867,9606.ENSP00000264335,9606.ENSP00000280357,9606.ENSP00000290378,9606.ENSP00000296503,9606.ENSP00000320171,9606.ENSP00000345672,9606.ENSP00000346032,9606.ENSP00000355627,9606.ENSP00000355645,9606.ENSP00000362924,9606.ENSP00000366047,9606.ENSP00000371267,9606.ENSP00000386857,9606.ENSP00000393887,9606.ENSP00000402373,…	VTN,C3,ATP5B,CAPG,YWHAE,IL18,ACTC1,HMGB2,PKM,CTSB,ANXA2,AGT,ACTA1,GSN,KLK6,YWHAQ,ACTG2,AHSG,ACTA2,LDHA,MYL6,CRABP2
GO:0035722	interleukin-12-mediated signaling pathway	3	47	1.42	0.0203	9606.ENSP00000215754,9606.ENSP00000346032,9606.ENSP00000446252	MIF,ANXA2,SOD2
GO:0042327	positive regulation of phosphorylation	10	1093	0.58	0.0203	9606.ENSP00000215754,9606.ENSP00000226218,9606.ENSP00000245907,9606.ENSP00000280357,9606.ENSP00000306099,9606.ENSP00000306361,9606.ENSP00000336829,9606.ENSP00000346032,9606.ENSP00000355627,9606.ENSP00000362413	MIF,VTN,C3,IL18,FGB,FGA,FGG,ANXA2,AGT,PGK1
GO:0051171	regulation of nitrogen compound metabolic process	26	5836	0.27	0.0208	9606.ENSP00000215754,9606.ENSP00000222553,9606.ENSP00000226218,9606.ENSP00000245907,9606.ENSP00000252699,9606.ENSP00000263238,9606.ENSP00000264335,9606.ENSP00000278407,9606.ENSP00000280357,9606.ENSP00000283752,9606.ENSP00000296503,9606.ENSP00000306099,9606.ENSP00000306361,9606.ENSP00000323929,9606.ENSP00000336829,9606.ENSP00000341584,9606.ENSP00000346032,9606.ENSP00000355627,9606.ENSP00000359991,…	MIF,NAMPT,VTN,C3,ACTN4,ACTR3,YWHAE,SERPING1,IL18,SERPINB3,HMGB2,FGB,FGA,A2M,FGG,SERPINB13,ANXA2,AGT,PGAM1,GSN,YWHAQ,ANXA4,AHSG,ACTA2,SOD2,CRABP2
GO:0010811	positive regulation of cell-substrate adhesion	4	124	1.13	0.0213	9606.ENSP00000226218,9606.ENSP00000306099,9606.ENSP00000306361,9606.ENSP00000336829	VTN,FGB,FGA,FGG
GO:0010817	regulation of hormone levels	7	524	0.75	0.0215	9606.ENSP00000306099,9606.ENSP00000306361,9606.ENSP00000336829,9606.ENSP00000345672,9606.ENSP00000355627,9606.ENSP00000366047,9606.ENSP00000482841	FGB,FGA,FGG,CTSB,AGT,KLK6,CRABP2
GO:0031323	regulation of cellular metabolic process	27	6239	0.26	0.0224	9606.ENSP00000215754,9606.ENSP00000222553,9606.ENSP00000226218,9606.ENSP00000245907,9606.ENSP00000252699,9606.ENSP00000263238,9606.ENSP00000264335,9606.ENSP00000278407,9606.ENSP00000280357,9606.ENSP00000283752,9606.ENSP00000296503,9606.ENSP00000306099,9606.ENSP00000306361,9606.ENSP00000323929,9606.ENSP00000336829,9606.ENSP00000341584,9606.ENSP00000346032,9606.ENSP00000355627,9606.ENSP00000359991,…	MIF,NAMPT,VTN,C3,ACTN4,ACTR3,YWHAE,SERPING1,IL18,SERPINB3,HMGB2,FGB,FGA,A2M,FGG,SERPINB13,ANXA2,AGT,PGAM1,PGK1,GSN,YWHAQ,ANXA4,AHSG,ACTA2,SOD2,CRABP2
GO:0007160	cell-matrix adhesion	4	127	1.12	0.0225	9606.ENSP00000226218,9606.ENSP00000306099,9606.ENSP00000306361,9606.ENSP00000336829	VTN,FGB,FGA,FGG
GO:0009611	response to wounding	7	532	0.74	0.0228	9606.ENSP00000278407,9606.ENSP00000306099,9606.ENSP00000306361,9606.ENSP00000323929,9606.ENSP00000336829,9606.ENSP00000366047,9606.ENSP00000379191	SERPING1,FGB,FGA,A2M,FGG,KLK6,CD59
GO:0030155	regulation of cell adhesion	8	712	0.67	0.0228	9606.ENSP00000226218,9606.ENSP00000252699,9606.ENSP00000262030,9606.ENSP00000280357,9606.ENSP00000306099,9606.ENSP00000306361,9606.ENSP00000336829,9606.ENSP00000362924	VTN,ACTN4,ATP5B,IL18,FGB,FGA,FGG,GSN
GO:0010942	positive regulation of cell death	8	719	0.67	0.0242	9606.ENSP00000251595,9606.ENSP00000264335,9606.ENSP00000300289,9606.ENSP00000355627,9606.ENSP00000362924,9606.ENSP00000371267,9606.ENSP00000445175,9606.ENSP00000446252	HBA2,YWHAE,PDIA3,AGT,GSN,YWHAQ,LDHA,SOD2
GO:0030240	skeletal muscle thin filament assembly	2	9	1.97	0.0245	9606.ENSP00000290378,9606.ENSP00000355645	ACTC1,ACTA1
GO:0048146	positive regulation of fibroblast proliferation	3	52	1.38	0.0248	9606.ENSP00000215754,9606.ENSP00000346032,9606.ENSP00000355627	MIF,ANXA2,AGT
GO:0048260	positive regulation of receptor-mediated endocytosis	3	53	1.37	0.026	9606.ENSP00000226218,9606.ENSP00000245907,9606.ENSP00000346032	VTN,C3,ANXA2
GO:0048660	regulation of smooth muscle cell proliferation	4	136	1.09	0.0277	9606.ENSP00000222553,9606.ENSP00000280357,9606.ENSP00000355627,9606.ENSP00000446252	NAMPT,IL18,AGT,SOD2
GO:0032268	regulation of cellular protein metabolic process	16	2693	0.39	0.0284	9606.ENSP00000215754,9606.ENSP00000226218,9606.ENSP00000245907,9606.ENSP00000264335,9606.ENSP00000278407,9606.ENSP00000280357,9606.ENSP00000283752,9606.ENSP00000306099,9606.ENSP00000306361,9606.ENSP00000323929,9606.ENSP00000336829,9606.ENSP00000341584,9606.ENSP00000346032,9606.ENSP00000355627,9606.ENSP00000362924,9606.ENSP00000393887	MIF,VTN,C3,YWHAE,SERPING1,IL18,SERPINB3,FGB,FGA,A2M,FGG,SERPINB13,ANXA2,AGT,GSN,AHSG
GO:0051094	positive regulation of developmental process	11	1389	0.52	0.0294	9606.ENSP00000245907,9606.ENSP00000280357,9606.ENSP00000283752,9606.ENSP00000296503,9606.ENSP00000306099,9606.ENSP00000306361,9606.ENSP00000320171,9606.ENSP00000336829,9606.ENSP00000355627,9606.ENSP00000446252,9606.ENSP00000482841	C3,IL18,SERPINB3,HMGB2,FGB,FGA,PKM,FGG,AGT,SOD2,CRABP2
GO:0080090	regulation of primary metabolic process	26	6032	0.25	0.0332	9606.ENSP00000215754,9606.ENSP00000222553,9606.ENSP00000226218,9606.ENSP00000245907,9606.ENSP00000252699,9606.ENSP00000263238,9606.ENSP00000264335,9606.ENSP00000278407,9606.ENSP00000280357,9606.ENSP00000283752,9606.ENSP00000296503,9606.ENSP00000306099,9606.ENSP00000306361,9606.ENSP00000323929,9606.ENSP00000336829,9606.ENSP00000341584,9606.ENSP00000346032,9606.ENSP00000355627,9606.ENSP00000359991,…	MIF,NAMPT,VTN,C3,ACTN4,ACTR3,YWHAE,SERPING1,IL18,SERPINB3,HMGB2,FGB,FGA,A2M,FGG,SERPINB13,ANXA2,AGT,PGAM1,GSN,YWHAQ,ANXA4,AHSG,ACTA2,SOD2,CRABP2
GO:0032879	regulation of localization	16	2740	0.39	0.0335	9606.ENSP00000215754,9606.ENSP00000226218,9606.ENSP00000245907,9606.ENSP00000252699,9606.ENSP00000262030,9606.ENSP00000264335,9606.ENSP00000283752,9606.ENSP00000306099,9606.ENSP00000306361,9606.ENSP00000336829,9606.ENSP00000346032,9606.ENSP00000355627,9606.ENSP00000362924,9606.ENSP00000371267,9606.ENSP00000393887,9606.ENSP00000446252	MIF,VTN,C3,ACTN4,ATP5B,YWHAE,SERPINB3,FGB,FGA,FGG,ANXA2,AGT,GSN,YWHAQ,AHSG,SOD2
GO:0009987	cellular process	45	15024	0.1	0.0356	9606.ENSP00000215754,9606.ENSP00000222553,9606.ENSP00000226218,9606.ENSP00000245907,9606.ENSP00000251595,9606.ENSP00000252699,9606.ENSP00000259396,9606.ENSP00000262030,9606.ENSP00000263238,9606.ENSP00000263867,9606.ENSP00000264335,9606.ENSP00000264613,9606.ENSP00000278407,9606.ENSP00000280357,9606.ENSP00000283752,9606.ENSP00000290378,9606.ENSP00000296370,9606.ENSP00000296503,9606.ENSP00000300289,…	MIF,NAMPT,VTN,C3,HBA2,ACTN4,ORM1,ATP5B,ACTR3,CAPG,YWHAE,CP,SERPING1,IL18,SERPINB3,ACTC1,S100P,HMGB2,PDIA3,FGB,FGA,KLK10,PKM,A2M,FGG,CTSB,ANXA2,AGT,ACTA1,PGAM1,ST6GALNAC6,PGK1,GSN,KLK6,YWHAQ,ANXA4,CD59,AHSG,ACTA2,GC,MUC5B,LDHA,SOD2,MYL6,CRABP2
GO:0001976	nervous system process involved in regulation of systemic arterial blood pressure	2	12	1.84	0.0379	9606.ENSP00000355627,9606.ENSP00000446252	AGT,SOD2
GO:0003008	system process	13	1942	0.45	0.0379	9606.ENSP00000222553,9606.ENSP00000278407,9606.ENSP00000290378,9606.ENSP00000306099,9606.ENSP00000306361,9606.ENSP00000336829,9606.ENSP00000355627,9606.ENSP00000355645,9606.ENSP00000362924,9606.ENSP00000386857,9606.ENSP00000402373,9606.ENSP00000446252,9606.ENSP00000446955	NAMPT,SERPING1,ACTC1,FGB,FGA,FGG,AGT,ACTA1,GSN,ACTG2,ACTA2,SOD2,MYL6
GO:0051014	actin filament severing	2	12	1.84	0.0379	9606.ENSP00000263867,9606.ENSP00000362924	CAPG,GSN
GO:1905952	regulation of lipid localization	4	151	1.04	0.0383	9606.ENSP00000215754,9606.ENSP00000245907,9606.ENSP00000346032,9606.ENSP00000355627	MIF,C3,ANXA2,AGT
GO:0030029	actin filament-based process	7	592	0.69	0.0385	9606.ENSP00000252699,9606.ENSP00000263238,9606.ENSP00000263867,9606.ENSP00000290378,9606.ENSP00000355645,9606.ENSP00000362924,9606.ENSP00000446955	ACTN4,ACTR3,CAPG,ACTC1,ACTA1,GSN,MYL6
GO:0051130	positive regulation of cellular component organization	10	1209	0.54	0.0385	9606.ENSP00000226218,9606.ENSP00000245907,9606.ENSP00000252699,9606.ENSP00000263238,9606.ENSP00000264335,9606.ENSP00000346032,9606.ENSP00000355627,9606.ENSP00000362924,9606.ENSP00000371267,9606.ENSP00000482841	VTN,C3,ACTN4,ACTR3,YWHAE,ANXA2,AGT,GSN,YWHAQ,CRABP2
GO:0009117	nucleotide metabolic process	6	422	0.77	0.0386	9606.ENSP00000222553,9606.ENSP00000262030,9606.ENSP00000320171,9606.ENSP00000359991,9606.ENSP00000362413,9606.ENSP00000445175	NAMPT,ATP5B,PKM,PGAM1,PGK1,LDHA
GO:0042246	tissue regeneration	3	63	1.3	0.0389	9606.ENSP00000320171,9606.ENSP00000362924,9606.ENSP00000366047	PKM,GSN,KLK6
GO:0045597	positive regulation of cell differentiation	9	993	0.58	0.0393	9606.ENSP00000280357,9606.ENSP00000283752,9606.ENSP00000296503,9606.ENSP00000306099,9606.ENSP00000306361,9606.ENSP00000336829,9606.ENSP00000355627,9606.ENSP00000446252,9606.ENSP00000482841	IL18,SERPINB3,HMGB2,FGB,FGA,FGG,AGT,SOD2,CRABP2
GO:0051716	cellular response to stimulus	27	6489	0.24	0.0395	9606.ENSP00000215754,9606.ENSP00000222553,9606.ENSP00000245907,9606.ENSP00000251595,9606.ENSP00000252699,9606.ENSP00000262030,9606.ENSP00000263238,9606.ENSP00000264335,9606.ENSP00000280357,9606.ENSP00000296503,9606.ENSP00000300289,9606.ENSP00000306099,9606.ENSP00000306361,9606.ENSP00000320171,9606.ENSP00000336829,9606.ENSP00000345672,9606.ENSP00000346032,9606.ENSP00000355627,9606.ENSP00000355645,…	MIF,NAMPT,C3,HBA2,ACTN4,ATP5B,ACTR3,YWHAE,IL18,HMGB2,PDIA3,FGB,FGA,PKM,FGG,CTSB,ANXA2,AGT,ACTA1,PGK1,GSN,YWHAQ,ANXA4,CD59,MUC5B,SOD2,CRABP2
GO:0031099	regeneration	4	157	1.03	0.0425	9606.ENSP00000226218,9606.ENSP00000320171,9606.ENSP00000362924,9606.ENSP00000366047	VTN,PKM,GSN,KLK6
GO:0050778	positive regulation of immune response	7	607	0.68	0.0431	9606.ENSP00000215754,9606.ENSP00000245907,9606.ENSP00000263238,9606.ENSP00000278407,9606.ENSP00000280357,9606.ENSP00000296503,9606.ENSP00000436812	MIF,C3,ACTR3,SERPING1,IL18,HMGB2,MUC5B
GO:0009892	negative regulation of metabolic process	17	3124	0.36	0.0442	9606.ENSP00000215754,9606.ENSP00000222553,9606.ENSP00000226218,9606.ENSP00000245907,9606.ENSP00000259396,9606.ENSP00000264335,9606.ENSP00000278407,9606.ENSP00000283752,9606.ENSP00000296503,9606.ENSP00000306361,9606.ENSP00000323929,9606.ENSP00000341584,9606.ENSP00000346032,9606.ENSP00000355627,9606.ENSP00000371267,9606.ENSP00000377833,9606.ENSP00000393887	MIF,NAMPT,VTN,C3,ORM1,YWHAE,SERPING1,SERPINB3,HMGB2,FGA,A2M,SERPINB13,ANXA2,AGT,YWHAQ,ANXA4,AHSG
GO:0010770	positive regulation of cell morphogenesis involved in differentiation	4	159	1.02	0.0442	9606.ENSP00000306099,9606.ENSP00000306361,9606.ENSP00000336829,9606.ENSP00000482841	FGB,FGA,FGG,CRABP2
GO:0001934	positive regulation of protein phosphorylation	9	1019	0.57	0.0453	9606.ENSP00000215754,9606.ENSP00000226218,9606.ENSP00000245907,9606.ENSP00000280357,9606.ENSP00000306099,9606.ENSP00000306361,9606.ENSP00000336829,9606.ENSP00000346032,9606.ENSP00000355627	MIF,VTN,C3,IL18,FGB,FGA,FGG,ANXA2,AGT
GO:0048869	cellular developmental process	19	3757	0.32	0.0453	9606.ENSP00000215754,9606.ENSP00000226218,9606.ENSP00000245907,9606.ENSP00000262030,9606.ENSP00000264335,9606.ENSP00000290378,9606.ENSP00000296503,9606.ENSP00000323929,9606.ENSP00000336829,9606.ENSP00000345672,9606.ENSP00000346032,9606.ENSP00000355627,9606.ENSP00000355645,9606.ENSP00000362413,9606.ENSP00000362924,9606.ENSP00000366047,9606.ENSP00000377833,9606.ENSP00000402373,9606.ENSP00000482841	MIF,VTN,C3,ATP5B,YWHAE,ACTC1,HMGB2,A2M,FGG,CTSB,ANXA2,AGT,ACTA1,PGK1,GSN,KLK6,ANXA4,ACTA2,CRABP2
GO:0044238	primary metabolic process	29	7332	0.22	0.0456	9606.ENSP00000215754,9606.ENSP00000222553,9606.ENSP00000245907,9606.ENSP00000262030,9606.ENSP00000264335,9606.ENSP00000264613,9606.ENSP00000278407,9606.ENSP00000280357,9606.ENSP00000296503,9606.ENSP00000300289,9606.ENSP00000306099,9606.ENSP00000306361,9606.ENSP00000311746,9606.ENSP00000320171,9606.ENSP00000323929,9606.ENSP00000336829,9606.ENSP00000345672,9606.ENSP00000346032,9606.ENSP00000355627,…	MIF,NAMPT,C3,ATP5B,YWHAE,CP,SERPING1,IL18,HMGB2,PDIA3,FGB,FGA,KLK10,PKM,A2M,FGG,CTSB,ANXA2,AGT,PGAM1,ST6GALNAC6,PGK1,GSN,KLK6,AHSG,GC,MUC5B,LDHA,CRABP2
GO:0051707	response to other organism	10	1256	0.52	0.0483	9606.ENSP00000215754,9606.ENSP00000245907,9606.ENSP00000263238,9606.ENSP00000278407,9606.ENSP00000280357,9606.ENSP00000296503,9606.ENSP00000306099,9606.ENSP00000306361,9606.ENSP00000362924,9606.ENSP00000402373	MIF,C3,ACTR3,SERPING1,IL18,HMGB2,FGB,FGA,GSN,ACTA2
GO:1903522	regulation of blood circulation	5	292	0.85	0.0484	9606.ENSP00000264335,9606.ENSP00000306099,9606.ENSP00000306361,9606.ENSP00000336829,9606.ENSP00000355627	YWHAE,FGB,FGA,FGG,AGT
GO:0006928	movement of cell or subcellular component	11	1501	0.48	0.0492	9606.ENSP00000215754,9606.ENSP00000226218,9606.ENSP00000252699,9606.ENSP00000262030,9606.ENSP00000263238,9606.ENSP00000264335,9606.ENSP00000290378,9606.ENSP00000296370,9606.ENSP00000296503,9606.ENSP00000355645,9606.ENSP00000446955	MIF,VTN,ACTN4,ATP5B,ACTR3,YWHAE,ACTC1,S100P,HMGB2,ACTA1,MYL6
