# Supplementary material for: Insights on Proteomics-Driven Body Fluid-Based Biomarkers of Cervical Cancer
Source: Proteomes. 2022 Apr 29;10(2):13. doi: 10.3390/proteomes10020013 (PMC9149910; doi:10.3390/proteomes10020013)
Supplement: Supplementary file 1 [file proteomes-10-00013-s001.zip › Supplementary Table S3_ Enriched cellular functions obtained from STRING webserver.xlsx]

## Sheet: Sheet 1 - enrichment.Function-9
Enriched cellular functions obtained from STRING webserver
#term ID	term description	observed gene count	background gene count	strength	false discovery rate	matching proteins in your network (IDs)	matching proteins in your network (labels)
GO:0004866	endopeptidase inhibitor activity	8	181	1.26	7.64e-05	9606.ENSP00000245907,9606.ENSP00000278407,9606.ENSP00000283752,9606.ENSP00000323929,9606.ENSP00000341584,9606.ENSP00000346032,9606.ENSP00000355627,9606.ENSP00000393887	C3,SERPING1,SERPINB3,A2M,SERPINB13,ANXA2,AGT,AHSG
GO:0005515	protein binding	36	7026	0.33	7.64e-05	9606.ENSP00000215754,9606.ENSP00000222553,9606.ENSP00000226218,9606.ENSP00000245907,9606.ENSP00000252699,9606.ENSP00000262030,9606.ENSP00000263238,9606.ENSP00000263867,9606.ENSP00000264335,9606.ENSP00000264613,9606.ENSP00000280357,9606.ENSP00000283752,9606.ENSP00000290378,9606.ENSP00000296370,9606.ENSP00000296503,9606.ENSP00000300289,9606.ENSP00000306099,9606.ENSP00000306361,9606.ENSP00000320171,…	MIF,NAMPT,VTN,C3,ACTN4,ATP5B,ACTR3,CAPG,YWHAE,CP,IL18,SERPINB3,ACTC1,S100P,HMGB2,PDIA3,FGB,FGA,PKM,A2M,FGG,SERPINB13,CTSB,ANXA2,AGT,ACTA1,PGAM1,GSN,YWHAQ,ANXA4,CD59,ACTA2,GC,LDHA,SOD2,CRABP2
GO:0004867	serine-type endopeptidase inhibitor activity	6	98	1.41	0.00015	9606.ENSP00000278407,9606.ENSP00000283752,9606.ENSP00000323929,9606.ENSP00000341584,9606.ENSP00000346032,9606.ENSP00000355627	SERPING1,SERPINB3,A2M,SERPINB13,ANXA2,AGT
GO:0004857	enzyme inhibitor activity	9	377	1	0.00021	9606.ENSP00000245907,9606.ENSP00000278407,9606.ENSP00000283752,9606.ENSP00000323929,9606.ENSP00000341584,9606.ENSP00000346032,9606.ENSP00000355627,9606.ENSP00000377833,9606.ENSP00000393887	C3,SERPING1,SERPINB3,A2M,SERPINB13,ANXA2,AGT,ANXA4,AHSG
GO:0050839	cell adhesion molecule binding	9	538	0.84	0.0033	9606.ENSP00000226218,9606.ENSP00000252699,9606.ENSP00000263867,9606.ENSP00000264335,9606.ENSP00000296370,9606.ENSP00000320171,9606.ENSP00000336829,9606.ENSP00000346032,9606.ENSP00000445175	VTN,ACTN4,CAPG,YWHAE,S100P,PKM,FGG,ANXA2,LDHA
GO:0005102	signaling receptor binding	14	1581	0.57	0.008	9606.ENSP00000215754,9606.ENSP00000222553,9606.ENSP00000226218,9606.ENSP00000245907,9606.ENSP00000252699,9606.ENSP00000262030,9606.ENSP00000280357,9606.ENSP00000296370,9606.ENSP00000296503,9606.ENSP00000306099,9606.ENSP00000306361,9606.ENSP00000323929,9606.ENSP00000336829,9606.ENSP00000355627	MIF,NAMPT,VTN,C3,ACTN4,ATP5B,IL18,S100P,HMGB2,FGB,FGA,A2M,FGG,AGT
GO:0048306	calcium-dependent protein binding	4	63	1.42	0.0104	9606.ENSP00000296370,9606.ENSP00000323929,9606.ENSP00000346032,9606.ENSP00000377833	S100P,A2M,ANXA2,ANXA4
GO:0002020	protease binding	5	138	1.18	0.0109	9606.ENSP00000215754,9606.ENSP00000283752,9606.ENSP00000323929,9606.ENSP00000341584,9606.ENSP00000346032	MIF,SERPINB3,A2M,SERPINB13,ANXA2
GO:0042802	identical protein binding	14	1896	0.49	0.0443	9606.ENSP00000215754,9606.ENSP00000222553,9606.ENSP00000226218,9606.ENSP00000252699,9606.ENSP00000264335,9606.ENSP00000296370,9606.ENSP00000300289,9606.ENSP00000320171,9606.ENSP00000336829,9606.ENSP00000346032,9606.ENSP00000371267,9606.ENSP00000377833,9606.ENSP00000445175,9606.ENSP00000446252	MIF,NAMPT,VTN,ACTN4,YWHAE,S100P,PDIA3,PKM,FGG,ANXA2,YWHAQ,ANXA4,LDHA,SOD2
GO:0043531	ADP binding	3	35	1.55	0.0443	9606.ENSP00000320171,9606.ENSP00000355645,9606.ENSP00000362413	PKM,ACTA1,PGK1
