# Supplementary material for: Insights on Proteomics-Driven Body Fluid-Based Biomarkers of Cervical Cancer
Source: Proteomes. 2022 Apr 29;10(2):13. doi: 10.3390/proteomes10020013 (PMC9149910; doi:10.3390/proteomes10020013)
Supplement: Supplementary file 1 [file proteomes-10-00013-s001.zip › Supplementary Table S4_ Enriched cellular components obtained from STRING webserver.xlsx]

## Sheet: Sheet 1 - enrichment.Component-
enrichment.Component-13
#term ID	term description	observed gene count	background gene count	strength	false discovery rate	matching proteins in your network (IDs)	matching proteins in your network (labels)
GO:0070062	extracellular exosome	42	2099	0.92	6e-32	9606.ENSP00000215754,9606.ENSP00000222553,9606.ENSP00000226218,9606.ENSP00000245907,9606.ENSP00000251595,9606.ENSP00000252699,9606.ENSP00000259396,9606.ENSP00000262030,9606.ENSP00000263238,9606.ENSP00000263867,9606.ENSP00000264335,9606.ENSP00000264613,9606.ENSP00000278407,9606.ENSP00000283752,9606.ENSP00000290378,9606.ENSP00000296370,9606.ENSP00000300289,9606.ENSP00000306099,9606.ENSP00000306361,…	MIF,NAMPT,VTN,C3,HBA2,ACTN4,ORM1,ATP5B,ACTR3,CAPG,YWHAE,CP,SERPING1,SERPINB3,ACTC1,S100P,PDIA3,FGB,FGA,PKM,A2M,FGG,SERPINB13,CTSB,ANXA2,AGT,ACTA1,PGAM1,PGK1,GSN,YWHAQ,ANXA4,CD59,ACTG2,AHSG,ACTA2,GC,MUC5B,LDHA,SOD2,MYL6,CRABP2
GO:0005615	extracellular space	45	3195	0.77	2.34e-30	9606.ENSP00000215754,9606.ENSP00000222553,9606.ENSP00000226218,9606.ENSP00000245907,9606.ENSP00000251595,9606.ENSP00000252699,9606.ENSP00000259396,9606.ENSP00000262030,9606.ENSP00000263238,9606.ENSP00000263867,9606.ENSP00000264335,9606.ENSP00000264613,9606.ENSP00000278407,9606.ENSP00000280357,9606.ENSP00000283752,9606.ENSP00000290378,9606.ENSP00000296370,9606.ENSP00000296503,9606.ENSP00000300289,…	MIF,NAMPT,VTN,C3,HBA2,ACTN4,ORM1,ATP5B,ACTR3,CAPG,YWHAE,CP,SERPING1,IL18,SERPINB3,ACTC1,S100P,HMGB2,PDIA3,FGB,FGA,PKM,A2M,FGG,SERPINB13,CTSB,ANXA2,AGT,ACTA1,PGAM1,PGK1,GSN,KLK6,YWHAQ,ANXA4,CD59,ACTG2,AHSG,ACTA2,GC,MUC5B,LDHA,SOD2,MYL6,CRABP2
GO:0005576	extracellular region	46	4166	0.66	2.8e-27	9606.ENSP00000215754,9606.ENSP00000222553,9606.ENSP00000226218,9606.ENSP00000245907,9606.ENSP00000251595,9606.ENSP00000252699,9606.ENSP00000259396,9606.ENSP00000262030,9606.ENSP00000263238,9606.ENSP00000263867,9606.ENSP00000264335,9606.ENSP00000264613,9606.ENSP00000278407,9606.ENSP00000280357,9606.ENSP00000283752,9606.ENSP00000290378,9606.ENSP00000296370,9606.ENSP00000296503,9606.ENSP00000300289,…	MIF,NAMPT,VTN,C3,HBA2,ACTN4,ORM1,ATP5B,ACTR3,CAPG,YWHAE,CP,SERPING1,IL18,SERPINB3,ACTC1,S100P,HMGB2,PDIA3,FGB,FGA,KLK10,PKM,A2M,FGG,SERPINB13,CTSB,ANXA2,AGT,ACTA1,PGAM1,PGK1,GSN,KLK6,YWHAQ,ANXA4,CD59,ACTG2,AHSG,ACTA2,GC,MUC5B,LDHA,SOD2,MYL6,CRABP2
GO:0031982	vesicle	44	3879	0.67	5.07e-25	9606.ENSP00000215754,9606.ENSP00000222553,9606.ENSP00000226218,9606.ENSP00000245907,9606.ENSP00000251595,9606.ENSP00000252699,9606.ENSP00000259396,9606.ENSP00000262030,9606.ENSP00000263238,9606.ENSP00000263867,9606.ENSP00000264335,9606.ENSP00000264613,9606.ENSP00000278407,9606.ENSP00000283752,9606.ENSP00000290378,9606.ENSP00000296370,9606.ENSP00000300289,9606.ENSP00000306099,9606.ENSP00000306361,…	MIF,NAMPT,VTN,C3,HBA2,ACTN4,ORM1,ATP5B,ACTR3,CAPG,YWHAE,CP,SERPING1,SERPINB3,ACTC1,S100P,PDIA3,FGB,FGA,KLK10,PKM,A2M,FGG,SERPINB13,CTSB,ANXA2,AGT,ACTA1,PGAM1,PGK1,GSN,KLK6,YWHAQ,ANXA4,CD59,ACTG2,AHSG,ACTA2,GC,MUC5B,LDHA,SOD2,MYL6,CRABP2
GO:0072562	blood microparticle	17	115	1.79	3.33e-23	9606.ENSP00000226218,9606.ENSP00000245907,9606.ENSP00000251595,9606.ENSP00000259396,9606.ENSP00000264613,9606.ENSP00000278407,9606.ENSP00000290378,9606.ENSP00000306099,9606.ENSP00000306361,9606.ENSP00000323929,9606.ENSP00000336829,9606.ENSP00000355627,9606.ENSP00000355645,9606.ENSP00000362924,9606.ENSP00000386857,9606.ENSP00000393887,9606.ENSP00000421725	VTN,C3,HBA2,ORM1,CP,SERPING1,ACTC1,FGB,FGA,A2M,FGG,AGT,ACTA1,GSN,ACTG2,AHSG,GC
GO:0034774	secretory granule lumen	16	324	1.31	1.33e-14	9606.ENSP00000215754,9606.ENSP00000245907,9606.ENSP00000252699,9606.ENSP00000259396,9606.ENSP00000278407,9606.ENSP00000283752,9606.ENSP00000296370,9606.ENSP00000306099,9606.ENSP00000306361,9606.ENSP00000320171,9606.ENSP00000323929,9606.ENSP00000336829,9606.ENSP00000346032,9606.ENSP00000359991,9606.ENSP00000362924,9606.ENSP00000393887	MIF,C3,ACTN4,ORM1,SERPING1,SERPINB3,S100P,FGB,FGA,PKM,A2M,FGG,ANXA2,PGAM1,GSN,AHSG
GO:0030141	secretory granule	20	845	0.99	4.41e-13	9606.ENSP00000215754,9606.ENSP00000245907,9606.ENSP00000252699,9606.ENSP00000259396,9606.ENSP00000278407,9606.ENSP00000283752,9606.ENSP00000296370,9606.ENSP00000306099,9606.ENSP00000306361,9606.ENSP00000311746,9606.ENSP00000320171,9606.ENSP00000323929,9606.ENSP00000336829,9606.ENSP00000345672,9606.ENSP00000346032,9606.ENSP00000359991,9606.ENSP00000362924,9606.ENSP00000366047,9606.ENSP00000379191,…	MIF,C3,ACTN4,ORM1,SERPING1,SERPINB3,S100P,FGB,FGA,KLK10,PKM,A2M,FGG,CTSB,ANXA2,PGAM1,GSN,KLK6,CD59,AHSG
GO:0062023	collagen-containing extracellular matrix	13	396	1.14	1.63e-09	9606.ENSP00000226218,9606.ENSP00000259396,9606.ENSP00000278407,9606.ENSP00000306099,9606.ENSP00000306361,9606.ENSP00000320171,9606.ENSP00000323929,9606.ENSP00000336829,9606.ENSP00000345672,9606.ENSP00000346032,9606.ENSP00000355627,9606.ENSP00000377833,9606.ENSP00000393887	VTN,ORM1,SERPING1,FGB,FGA,PKM,A2M,FGG,CTSB,ANXA2,AGT,ANXA4,AHSG
GO:0031093	platelet alpha granule lumen	8	68	1.69	1.7e-09	9606.ENSP00000252699,9606.ENSP00000259396,9606.ENSP00000278407,9606.ENSP00000306099,9606.ENSP00000306361,9606.ENSP00000323929,9606.ENSP00000336829,9606.ENSP00000393887	ACTN4,ORM1,SERPING1,FGB,FGA,A2M,FGG,AHSG
GO:0005737	cytoplasm	47	11428	0.23	1.8e-09	9606.ENSP00000215754,9606.ENSP00000222553,9606.ENSP00000226218,9606.ENSP00000245907,9606.ENSP00000251595,9606.ENSP00000252699,9606.ENSP00000259396,9606.ENSP00000262030,9606.ENSP00000263238,9606.ENSP00000263867,9606.ENSP00000264335,9606.ENSP00000264613,9606.ENSP00000278407,9606.ENSP00000280357,9606.ENSP00000283752,9606.ENSP00000290378,9606.ENSP00000296370,9606.ENSP00000296503,9606.ENSP00000300289,…	MIF,NAMPT,VTN,C3,HBA2,ACTN4,ORM1,ATP5B,ACTR3,CAPG,YWHAE,CP,SERPING1,IL18,SERPINB3,ACTC1,S100P,HMGB2,PDIA3,FGB,FGA,KLK10,PKM,A2M,FGG,SERPINB13,CTSB,ANXA2,AGT,ACTA1,PGAM1,ST6GALNAC6,PGK1,GSN,KLK6,YWHAQ,ANXA4,CD59,ACTG2,AHSG,ACTA2,GC,MUC5B,LDHA,SOD2,MYL6,CRABP2
GO:0031410	cytoplasmic vesicle	24	2386	0.62	1.7e-08	9606.ENSP00000215754,9606.ENSP00000245907,9606.ENSP00000251595,9606.ENSP00000252699,9606.ENSP00000259396,9606.ENSP00000263867,9606.ENSP00000264335,9606.ENSP00000278407,9606.ENSP00000283752,9606.ENSP00000296370,9606.ENSP00000300289,9606.ENSP00000306099,9606.ENSP00000306361,9606.ENSP00000311746,9606.ENSP00000320171,9606.ENSP00000323929,9606.ENSP00000336829,9606.ENSP00000345672,9606.ENSP00000346032,…	MIF,C3,HBA2,ACTN4,ORM1,CAPG,YWHAE,SERPING1,SERPINB3,S100P,PDIA3,FGB,FGA,KLK10,PKM,A2M,FGG,CTSB,ANXA2,PGAM1,GSN,KLK6,CD59,AHSG
GO:0043227	membrane-bounded organelle	46	12427	0.19	1.92e-06	9606.ENSP00000215754,9606.ENSP00000222553,9606.ENSP00000226218,9606.ENSP00000245907,9606.ENSP00000251595,9606.ENSP00000252699,9606.ENSP00000259396,9606.ENSP00000262030,9606.ENSP00000263238,9606.ENSP00000263867,9606.ENSP00000264335,9606.ENSP00000264613,9606.ENSP00000278407,9606.ENSP00000283752,9606.ENSP00000290378,9606.ENSP00000296370,9606.ENSP00000296503,9606.ENSP00000300289,9606.ENSP00000306099,…	MIF,NAMPT,VTN,C3,HBA2,ACTN4,ORM1,ATP5B,ACTR3,CAPG,YWHAE,CP,SERPING1,SERPINB3,ACTC1,S100P,HMGB2,PDIA3,FGB,FGA,KLK10,PKM,A2M,FGG,SERPINB13,CTSB,ANXA2,AGT,ACTA1,PGAM1,ST6GALNAC6,PGK1,GSN,KLK6,YWHAQ,ANXA4,CD59,ACTG2,AHSG,ACTA2,GC,MUC5B,LDHA,SOD2,MYL6,CRABP2
GO:0070013	intracellular organelle lumen	31	5857	0.34	4.4e-05	9606.ENSP00000215754,9606.ENSP00000222553,9606.ENSP00000226218,9606.ENSP00000245907,9606.ENSP00000251595,9606.ENSP00000252699,9606.ENSP00000259396,9606.ENSP00000262030,9606.ENSP00000263867,9606.ENSP00000264613,9606.ENSP00000278407,9606.ENSP00000283752,9606.ENSP00000296370,9606.ENSP00000296503,9606.ENSP00000300289,9606.ENSP00000306099,9606.ENSP00000306361,9606.ENSP00000320171,9606.ENSP00000323929,…	MIF,NAMPT,VTN,C3,HBA2,ACTN4,ORM1,ATP5B,CAPG,CP,SERPING1,SERPINB3,S100P,HMGB2,PDIA3,FGB,FGA,PKM,A2M,FGG,SERPINB13,CTSB,ANXA2,PGAM1,GSN,KLK6,AHSG,GC,MUC5B,SOD2,CRABP2
GO:0012505	endomembrane system	27	4542	0.39	4.82e-05	9606.ENSP00000215754,9606.ENSP00000226218,9606.ENSP00000245907,9606.ENSP00000252699,9606.ENSP00000259396,9606.ENSP00000264613,9606.ENSP00000278407,9606.ENSP00000283752,9606.ENSP00000296370,9606.ENSP00000300289,9606.ENSP00000306099,9606.ENSP00000306361,9606.ENSP00000311746,9606.ENSP00000320171,9606.ENSP00000323929,9606.ENSP00000336829,9606.ENSP00000345672,9606.ENSP00000346032,9606.ENSP00000359991,…	MIF,VTN,C3,ACTN4,ORM1,CP,SERPING1,SERPINB3,S100P,PDIA3,FGB,FGA,KLK10,PKM,A2M,FGG,CTSB,ANXA2,PGAM1,ST6GALNAC6,GSN,KLK6,ANXA4,CD59,AHSG,MUC5B,CRABP2
GO:0030027	lamellipodium	7	202	1.16	5.84e-05	9606.ENSP00000263238,9606.ENSP00000263867,9606.ENSP00000290378,9606.ENSP00000355645,9606.ENSP00000362924,9606.ENSP00000386857,9606.ENSP00000402373	ACTR3,CAPG,ACTC1,ACTA1,GSN,ACTG2,ACTA2
GO:0015629	actin cytoskeleton	9	477	0.9	0.00017	9606.ENSP00000252699,9606.ENSP00000263238,9606.ENSP00000263867,9606.ENSP00000290378,9606.ENSP00000355645,9606.ENSP00000362924,9606.ENSP00000386857,9606.ENSP00000402373,9606.ENSP00000446955	ACTN4,ACTR3,CAPG,ACTC1,ACTA1,GSN,ACTG2,ACTA2,MYL6
GO:0005577	fibrinogen complex	3	8	2.19	0.00018	9606.ENSP00000306099,9606.ENSP00000306361,9606.ENSP00000336829	FGB,FGA,FGG
GO:0043229	intracellular organelle	44	12528	0.16	0.00022	9606.ENSP00000215754,9606.ENSP00000222553,9606.ENSP00000226218,9606.ENSP00000245907,9606.ENSP00000251595,9606.ENSP00000252699,9606.ENSP00000259396,9606.ENSP00000262030,9606.ENSP00000263238,9606.ENSP00000263867,9606.ENSP00000264335,9606.ENSP00000264613,9606.ENSP00000278407,9606.ENSP00000283752,9606.ENSP00000290378,9606.ENSP00000296370,9606.ENSP00000296503,9606.ENSP00000300289,9606.ENSP00000306099,…	MIF,NAMPT,VTN,C3,HBA2,ACTN4,ORM1,ATP5B,ACTR3,CAPG,YWHAE,CP,SERPING1,SERPINB3,ACTC1,S100P,HMGB2,PDIA3,FGB,FGA,KLK10,PKM,A2M,FGG,SERPINB13,CTSB,ANXA2,ACTA1,PGAM1,ST6GALNAC6,GSN,KLK6,YWHAQ,ANXA4,CD59,ACTG2,AHSG,ACTA2,GC,MUC5B,LDHA,SOD2,MYL6,CRABP2
GO:0009986	cell surface	11	824	0.74	0.00026	9606.ENSP00000215754,9606.ENSP00000245907,9606.ENSP00000262030,9606.ENSP00000300289,9606.ENSP00000306099,9606.ENSP00000306361,9606.ENSP00000336829,9606.ENSP00000345672,9606.ENSP00000346032,9606.ENSP00000377833,9606.ENSP00000379191	MIF,C3,ATP5B,PDIA3,FGB,FGA,FGG,CTSB,ANXA2,ANXA4,CD59
GO:0005775	vacuolar lumen	6	174	1.16	0.00033	9606.ENSP00000245907,9606.ENSP00000283752,9606.ENSP00000341584,9606.ENSP00000345672,9606.ENSP00000346032,9606.ENSP00000421725	C3,SERPINB3,SERPINB13,CTSB,ANXA2,GC
GO:0005925	focal adhesion	8	405	0.92	0.00041	9606.ENSP00000252699,9606.ENSP00000263238,9606.ENSP00000264335,9606.ENSP00000290378,9606.ENSP00000300289,9606.ENSP00000362924,9606.ENSP00000371267,9606.ENSP00000379191	ACTN4,ACTR3,YWHAE,ACTC1,PDIA3,GSN,YWHAQ,CD59
GO:0042470	melanosome	5	104	1.3	0.00044	9606.ENSP00000263867,9606.ENSP00000264335,9606.ENSP00000300289,9606.ENSP00000345672,9606.ENSP00000346032	CAPG,YWHAE,PDIA3,CTSB,ANXA2
GO:0031252	cell leading edge	8	425	0.89	0.00052	9606.ENSP00000263238,9606.ENSP00000263867,9606.ENSP00000290378,9606.ENSP00000346032,9606.ENSP00000355645,9606.ENSP00000362924,9606.ENSP00000386857,9606.ENSP00000402373	ACTR3,CAPG,ACTC1,ANXA2,ACTA1,GSN,ACTG2,ACTA2
GO:0005788	endoplasmic reticulum lumen	7	308	0.98	0.0006	9606.ENSP00000226218,9606.ENSP00000245907,9606.ENSP00000264613,9606.ENSP00000300289,9606.ENSP00000306361,9606.ENSP00000336829,9606.ENSP00000393887	VTN,C3,CP,PDIA3,FGA,FGG,AHSG
GO:1904813	ficolin-1-rich granule lumen	5	125	1.22	0.00092	9606.ENSP00000215754,9606.ENSP00000320171,9606.ENSP00000345672,9606.ENSP00000359991,9606.ENSP00000362924	MIF,PKM,CTSB,PGAM1,GSN
GO:0005829	cytosol	25	5193	0.3	0.0058	9606.ENSP00000215754,9606.ENSP00000222553,9606.ENSP00000251595,9606.ENSP00000252699,9606.ENSP00000263238,9606.ENSP00000264335,9606.ENSP00000280357,9606.ENSP00000290378,9606.ENSP00000320171,9606.ENSP00000323929,9606.ENSP00000341584,9606.ENSP00000346032,9606.ENSP00000355627,9606.ENSP00000355645,9606.ENSP00000359991,9606.ENSP00000362413,9606.ENSP00000362924,9606.ENSP00000371267,9606.ENSP00000377833,…	MIF,NAMPT,HBA2,ACTN4,ACTR3,YWHAE,IL18,ACTC1,PKM,A2M,SERPINB13,ANXA2,AGT,ACTA1,PGAM1,PGK1,GSN,YWHAQ,ANXA4,ACTG2,ACTA2,GC,LDHA,MYL6,CRABP2
GO:0070161	anchoring junction	9	820	0.66	0.0077	9606.ENSP00000252699,9606.ENSP00000263238,9606.ENSP00000264335,9606.ENSP00000290378,9606.ENSP00000300289,9606.ENSP00000346032,9606.ENSP00000362924,9606.ENSP00000371267,9606.ENSP00000379191	ACTN4,ACTR3,YWHAE,ACTC1,PDIA3,ANXA2,GSN,YWHAQ,CD59
GO:0030175	filopodium	4	106	1.2	0.0079	9606.ENSP00000290378,9606.ENSP00000355645,9606.ENSP00000386857,9606.ENSP00000402373	ACTC1,ACTA1,ACTG2,ACTA2
GO:0098858	actin-based cell projection	5	214	0.99	0.0097	9606.ENSP00000290378,9606.ENSP00000296370,9606.ENSP00000355645,9606.ENSP00000386857,9606.ENSP00000402373	ACTC1,S100P,ACTA1,ACTG2,ACTA2
GO:0005938	cell cortex	5	292	0.85	0.0383	9606.ENSP00000252699,9606.ENSP00000306099,9606.ENSP00000306361,9606.ENSP00000346032,9606.ENSP00000362924	ACTN4,FGB,FGA,ANXA2,GSN
