# Supplementary material for: Insights on Proteomics-Driven Body Fluid-Based Biomarkers of Cervical Cancer
Source: Proteomes. 2022 Apr 29;10(2):13. doi: 10.3390/proteomes10020013 (PMC9149910; doi:10.3390/proteomes10020013)
Supplement: Supplementary file 1 [file proteomes-10-00013-s001.zip › Supplementary Table S5_ Enriched KEGG pathways from STRING webserver.xlsx]

## Sheet: Sheet 1 - enrichment.KEGG-2
enriched KEGG pathways from STRING analysis
#term ID	term description	observed gene count	background gene count	strength	false discovery rate	matching proteins in your network (IDs)	matching proteins in your network (labels)
hsa04610	Complement and coagulation cascades	8	82	1.61	1.76e-08	9606.ENSP00000226218,9606.ENSP00000245907,9606.ENSP00000278407,9606.ENSP00000306099,9606.ENSP00000306361,9606.ENSP00000323929,9606.ENSP00000336829,9606.ENSP00000379191	VTN,C3,SERPING1,FGB,FGA,A2M,FGG,CD59
hsa05203	Viral carcinogenesis	6	182	1.14	0.0013	9606.ENSP00000245907,9606.ENSP00000252699,9606.ENSP00000264335,9606.ENSP00000320171,9606.ENSP00000362924,9606.ENSP00000371267	C3,ACTN4,YWHAE,PKM,GSN,YWHAQ
hsa00010	Glycolysis / Gluconeogenesis	4	65	1.41	0.0034	9606.ENSP00000320171,9606.ENSP00000359991,9606.ENSP00000362413,9606.ENSP00000445175	PKM,PGAM1,PGK1,LDHA
hsa04270	Vascular smooth muscle contraction	4	133	1.1	0.0365	9606.ENSP00000355627,9606.ENSP00000386857,9606.ENSP00000402373,9606.ENSP00000446955	AGT,ACTG2,ACTA2,MYL6
