# Supplementary material for: Insights on Proteomics-Driven Body Fluid-Based Biomarkers of Cervical Cancer
Source: Proteomes. 2022 Apr 29;10(2):13. doi: 10.3390/proteomes10020013 (PMC9149910; doi:10.3390/proteomes10020013)
Supplement: Supplementary file 1 [file proteomes-10-00013-s001.zip › Supplementary Table S6_ Enriched REACTOME pathways from STRING webserver.xlsx]

## Sheet: Sheet 1 - enrichment.RCTM
enrichment.RCTM
#term ID	term description	observed gene count	background gene count	strength	false discovery rate	matching proteins in your network (IDs)	matching proteins in your network (labels)
HSA-168249	Innate Immune System	19	1025	0.89	1.56e-08	9606.ENSP00000215754,9606.ENSP00000226218,9606.ENSP00000245907,9606.ENSP00000259396,9606.ENSP00000263238,9606.ENSP00000278407,9606.ENSP00000283752,9606.ENSP00000296370,9606.ENSP00000306099,9606.ENSP00000306361,9606.ENSP00000320171,9606.ENSP00000336829,9606.ENSP00000345672,9606.ENSP00000346032,9606.ENSP00000359991,9606.ENSP00000362924,9606.ENSP00000379191,9606.ENSP00000393887,9606.ENSP00000436812	MIF,VTN,C3,ORM1,ACTR3,SERPING1,SERPINB3,S100P,FGB,FGA,PKM,FGG,CTSB,ANXA2,PGAM1,GSN,CD59,AHSG,MUC5B
HSA-168256	Immune System	22	1956	0.67	1.14e-06	9606.ENSP00000215754,9606.ENSP00000226218,9606.ENSP00000245907,9606.ENSP00000259396,9606.ENSP00000263238,9606.ENSP00000278407,9606.ENSP00000280357,9606.ENSP00000283752,9606.ENSP00000296370,9606.ENSP00000300289,9606.ENSP00000306099,9606.ENSP00000306361,9606.ENSP00000320171,9606.ENSP00000336829,9606.ENSP00000345672,9606.ENSP00000346032,9606.ENSP00000359991,9606.ENSP00000362924,9606.ENSP00000379191,…	MIF,VTN,C3,ORM1,ACTR3,SERPING1,IL18,SERPINB3,S100P,PDIA3,FGB,FGA,PKM,FGG,CTSB,ANXA2,PGAM1,GSN,CD59,AHSG,MUC5B,SOD2
HSA-114608	Platelet degranulation	8	127	1.42	5.94e-06	9606.ENSP00000252699,9606.ENSP00000259396,9606.ENSP00000278407,9606.ENSP00000306099,9606.ENSP00000306361,9606.ENSP00000323929,9606.ENSP00000336829,9606.ENSP00000393887	ACTN4,ORM1,SERPING1,FGB,FGA,A2M,FGG,AHSG
HSA-6798695	Neutrophil degranulation	12	473	1.02	5.94e-06	9606.ENSP00000215754,9606.ENSP00000245907,9606.ENSP00000259396,9606.ENSP00000283752,9606.ENSP00000296370,9606.ENSP00000320171,9606.ENSP00000345672,9606.ENSP00000346032,9606.ENSP00000359991,9606.ENSP00000362924,9606.ENSP00000379191,9606.ENSP00000393887	MIF,C3,ORM1,SERPINB3,S100P,PKM,CTSB,ANXA2,PGAM1,GSN,CD59,AHSG
HSA-140877	Formation of Fibrin Clot (Clotting Cascade)	5	39	1.73	0.00019	9606.ENSP00000278407,9606.ENSP00000306099,9606.ENSP00000306361,9606.ENSP00000323929,9606.ENSP00000336829	SERPING1,FGB,FGA,A2M,FGG
HSA-109582	Hemostasis	10	605	0.84	0.0034	9606.ENSP00000215754,9606.ENSP00000252699,9606.ENSP00000259396,9606.ENSP00000278407,9606.ENSP00000306099,9606.ENSP00000306361,9606.ENSP00000323929,9606.ENSP00000336829,9606.ENSP00000346032,9606.ENSP00000393887	MIF,ACTN4,ORM1,SERPING1,FGB,FGA,A2M,FGG,ANXA2,AHSG
HSA-445355	Smooth Muscle Contraction	4	38	1.64	0.0058	9606.ENSP00000346032,9606.ENSP00000386857,9606.ENSP00000402373,9606.ENSP00000446955	ANXA2,ACTG2,ACTA2,MYL6
HSA-397014	Muscle contraction	6	193	1.11	0.0116	9606.ENSP00000290378,9606.ENSP00000346032,9606.ENSP00000355645,9606.ENSP00000386857,9606.ENSP00000402373,9606.ENSP00000446955	ACTC1,ANXA2,ACTA1,ACTG2,ACTA2,MYL6
HSA-8957275	Post-translational protein phosphorylation	5	107	1.29	0.0116	9606.ENSP00000245907,9606.ENSP00000264613,9606.ENSP00000306361,9606.ENSP00000336829,9606.ENSP00000393887	C3,CP,FGA,FGG,AHSG
HSA-977606	Regulation of Complement cascade	4	47	1.55	0.0116	9606.ENSP00000226218,9606.ENSP00000245907,9606.ENSP00000278407,9606.ENSP00000379191	VTN,C3,SERPING1,CD59
HSA-354194	GRB2:SOS provides linkage to MAPK signaling for Integrins	3	15	1.92	0.0137	9606.ENSP00000306099,9606.ENSP00000306361,9606.ENSP00000336829	FGB,FGA,FGG
HSA-372708	p130Cas linkage to MAPK signaling for integrins	3	15	1.92	0.0137	9606.ENSP00000306099,9606.ENSP00000306361,9606.ENSP00000336829	FGB,FGA,FGG
HSA-381426	Regulation of Insulin-like Growth Factor (IGF) transport and uptake by Insulin-like Growth Factor Binding Proteins (IGFBPs)	5	124	1.22	0.0158	9606.ENSP00000245907,9606.ENSP00000264613,9606.ENSP00000306361,9606.ENSP00000336829,9606.ENSP00000393887	C3,CP,FGA,FGG,AHSG
HSA-5686938	Regulation of TLR by endogenous ligand	3	19	1.82	0.0197	9606.ENSP00000306099,9606.ENSP00000306361,9606.ENSP00000336829	FGB,FGA,FGG
HSA-140875	Common Pathway of Fibrin Clot Formation	3	22	1.75	0.0276	9606.ENSP00000306099,9606.ENSP00000306361,9606.ENSP00000336829	FGB,FGA,FGG
