# Supplementary material for: Insights on Proteomics-Driven Body Fluid-Based Biomarkers of Cervical Cancer
Source: Proteomes. 2022 Apr 29;10(2):13. doi: 10.3390/proteomes10020013 (PMC9149910; doi:10.3390/proteomes10020013)
Supplement: Supplementary file 1 [file proteomes-10-00013-s001.zip › Supplementary Table S7_ Enriched subcellular compartments from STRING webserver.xlsx]

## Sheet: Sheet 1 - enrichment.COMPARTMEN
enrichment.COMPARTMENTS
#term ID	term description	observed gene count	background gene count	strength	false discovery rate	matching proteins in your network (IDs)	matching proteins in your network (labels)
GOCC:0005615	Extracellular space	32	990	1.13	5.43e-27	9606.ENSP00000215754,9606.ENSP00000222553,9606.ENSP00000226218,9606.ENSP00000245907,9606.ENSP00000251595,9606.ENSP00000252699,9606.ENSP00000259396,9606.ENSP00000264613,9606.ENSP00000278407,9606.ENSP00000280357,9606.ENSP00000290378,9606.ENSP00000296503,9606.ENSP00000300289,9606.ENSP00000306099,9606.ENSP00000306361,9606.ENSP00000320171,9606.ENSP00000323929,9606.ENSP00000336829,9606.ENSP00000345672,…	MIF,NAMPT,VTN,C3,HBA2,ACTN4,ORM1,CP,SERPING1,IL18,ACTC1,HMGB2,PDIA3,FGB,FGA,PKM,A2M,FGG,CTSB,ANXA2,AGT,ACTA1,PGK1,GSN,ANXA4,CD59,ACTG2,AHSG,ACTA2,GC,LDHA,SOD2
GOCC:0072562	Blood microparticle	17	116	1.79	1.52e-22	9606.ENSP00000226218,9606.ENSP00000245907,9606.ENSP00000251595,9606.ENSP00000259396,9606.ENSP00000264613,9606.ENSP00000278407,9606.ENSP00000290378,9606.ENSP00000306099,9606.ENSP00000306361,9606.ENSP00000323929,9606.ENSP00000336829,9606.ENSP00000355627,9606.ENSP00000355645,9606.ENSP00000362924,9606.ENSP00000386857,9606.ENSP00000393887,9606.ENSP00000421725	VTN,C3,HBA2,ORM1,CP,SERPING1,ACTC1,FGB,FGA,A2M,FGG,AGT,ACTA1,GSN,ACTG2,AHSG,GC
GOCC:0005576	Extracellular region	35	2083	0.84	1.51e-21	9606.ENSP00000215754,9606.ENSP00000222553,9606.ENSP00000226218,9606.ENSP00000245907,9606.ENSP00000251595,9606.ENSP00000252699,9606.ENSP00000259396,9606.ENSP00000264613,9606.ENSP00000278407,9606.ENSP00000280357,9606.ENSP00000290378,9606.ENSP00000296503,9606.ENSP00000300289,9606.ENSP00000306099,9606.ENSP00000306361,9606.ENSP00000311746,9606.ENSP00000320171,9606.ENSP00000323929,9606.ENSP00000336829,…	MIF,NAMPT,VTN,C3,HBA2,ACTN4,ORM1,CP,SERPING1,IL18,ACTC1,HMGB2,PDIA3,FGB,FGA,KLK10,PKM,A2M,FGG,CTSB,ANXA2,AGT,ACTA1,PGK1,GSN,KLK6,ANXA4,CD59,ACTG2,AHSG,ACTA2,GC,MUC5B,LDHA,SOD2
GOCC:1903561	Extracellular vesicle	20	453	1.26	1.11e-17	9606.ENSP00000215754,9606.ENSP00000226218,9606.ENSP00000245907,9606.ENSP00000252699,9606.ENSP00000264613,9606.ENSP00000278407,9606.ENSP00000320171,9606.ENSP00000323929,9606.ENSP00000345672,9606.ENSP00000346032,9606.ENSP00000355645,9606.ENSP00000362413,9606.ENSP00000362924,9606.ENSP00000377833,9606.ENSP00000379191,9606.ENSP00000393887,9606.ENSP00000402373,9606.ENSP00000421725,9606.ENSP00000445175,…	MIF,VTN,C3,ACTN4,CP,SERPING1,PKM,A2M,CTSB,ANXA2,ACTA1,PGK1,GSN,ANXA4,CD59,AHSG,ACTA2,GC,LDHA,SOD2
GOCC:0043230	Extracellular organelle	20	460	1.26	1.19e-17	9606.ENSP00000215754,9606.ENSP00000226218,9606.ENSP00000245907,9606.ENSP00000252699,9606.ENSP00000264613,9606.ENSP00000278407,9606.ENSP00000320171,9606.ENSP00000323929,9606.ENSP00000345672,9606.ENSP00000346032,9606.ENSP00000355645,9606.ENSP00000362413,9606.ENSP00000362924,9606.ENSP00000377833,9606.ENSP00000379191,9606.ENSP00000393887,9606.ENSP00000402373,9606.ENSP00000421725,9606.ENSP00000445175,…	MIF,VTN,C3,ACTN4,CP,SERPING1,PKM,A2M,CTSB,ANXA2,ACTA1,PGK1,GSN,ANXA4,CD59,AHSG,ACTA2,GC,LDHA,SOD2
GOCC:0031012	Extracellular matrix	21	690	1.1	1.01e-15	9606.ENSP00000222553,9606.ENSP00000226218,9606.ENSP00000245907,9606.ENSP00000259396,9606.ENSP00000264613,9606.ENSP00000278407,9606.ENSP00000300289,9606.ENSP00000306099,9606.ENSP00000306361,9606.ENSP00000320171,9606.ENSP00000323929,9606.ENSP00000336829,9606.ENSP00000345672,9606.ENSP00000346032,9606.ENSP00000355645,9606.ENSP00000362924,9606.ENSP00000377833,9606.ENSP00000393887,9606.ENSP00000402373,…	NAMPT,VTN,C3,ORM1,CP,SERPING1,PDIA3,FGB,FGA,PKM,A2M,FGG,CTSB,ANXA2,ACTA1,GSN,ANXA4,AHSG,ACTA2,GC,MUC5B
GOCC:0070062	Extracellular exosome	17	370	1.28	4.69e-15	9606.ENSP00000215754,9606.ENSP00000226218,9606.ENSP00000245907,9606.ENSP00000252699,9606.ENSP00000264613,9606.ENSP00000320171,9606.ENSP00000323929,9606.ENSP00000345672,9606.ENSP00000346032,9606.ENSP00000362413,9606.ENSP00000362924,9606.ENSP00000377833,9606.ENSP00000379191,9606.ENSP00000393887,9606.ENSP00000402373,9606.ENSP00000445175,9606.ENSP00000446252	MIF,VTN,C3,ACTN4,CP,PKM,A2M,CTSB,ANXA2,PGK1,GSN,ANXA4,CD59,AHSG,ACTA2,LDHA,SOD2
GOCC:0031982	Vesicle	29	2251	0.73	1.29e-13	9606.ENSP00000215754,9606.ENSP00000226218,9606.ENSP00000245907,9606.ENSP00000251595,9606.ENSP00000252699,9606.ENSP00000259396,9606.ENSP00000262030,9606.ENSP00000264613,9606.ENSP00000278407,9606.ENSP00000283752,9606.ENSP00000300289,9606.ENSP00000306099,9606.ENSP00000306361,9606.ENSP00000320171,9606.ENSP00000323929,9606.ENSP00000336829,9606.ENSP00000345672,9606.ENSP00000346032,9606.ENSP00000355645,…	MIF,VTN,C3,HBA2,ACTN4,ORM1,ATP5B,CP,SERPING1,SERPINB3,PDIA3,FGB,FGA,PKM,A2M,FGG,CTSB,ANXA2,ACTA1,PGAM1,PGK1,GSN,ANXA4,CD59,AHSG,ACTA2,GC,LDHA,SOD2
GOCC:0060205	Cytoplasmic vesicle lumen	13	256	1.33	1.31e-11	9606.ENSP00000245907,9606.ENSP00000251595,9606.ENSP00000252699,9606.ENSP00000259396,9606.ENSP00000278407,9606.ENSP00000283752,9606.ENSP00000306099,9606.ENSP00000306361,9606.ENSP00000323929,9606.ENSP00000336829,9606.ENSP00000346032,9606.ENSP00000362924,9606.ENSP00000393887	C3,HBA2,ACTN4,ORM1,SERPING1,SERPINB3,FGB,FGA,A2M,FGG,ANXA2,GSN,AHSG
GOCC:0031983	Vesicle lumen	13	260	1.32	1.43e-11	9606.ENSP00000245907,9606.ENSP00000251595,9606.ENSP00000252699,9606.ENSP00000259396,9606.ENSP00000278407,9606.ENSP00000283752,9606.ENSP00000306099,9606.ENSP00000306361,9606.ENSP00000323929,9606.ENSP00000336829,9606.ENSP00000346032,9606.ENSP00000362924,9606.ENSP00000393887	C3,HBA2,ACTN4,ORM1,SERPING1,SERPINB3,FGB,FGA,A2M,FGG,ANXA2,GSN,AHSG
GOCC:0005737	Cytoplasm	45	8790	0.33	2.11e-11	9606.ENSP00000215754,9606.ENSP00000222553,9606.ENSP00000226218,9606.ENSP00000245907,9606.ENSP00000251595,9606.ENSP00000252699,9606.ENSP00000259396,9606.ENSP00000262030,9606.ENSP00000263238,9606.ENSP00000263867,9606.ENSP00000264335,9606.ENSP00000264613,9606.ENSP00000278407,9606.ENSP00000280357,9606.ENSP00000283752,9606.ENSP00000290378,9606.ENSP00000296370,9606.ENSP00000296503,9606.ENSP00000300289,…	MIF,NAMPT,VTN,C3,HBA2,ACTN4,ORM1,ATP5B,ACTR3,CAPG,YWHAE,CP,SERPING1,IL18,SERPINB3,ACTC1,S100P,HMGB2,PDIA3,FGB,FGA,PKM,A2M,FGG,SERPINB13,CTSB,ANXA2,ACTA1,PGAM1,ST6GALNAC6,PGK1,GSN,KLK6,YWHAQ,ANXA4,CD59,ACTG2,AHSG,ACTA2,GC,MUC5B,LDHA,SOD2,MYL6,CRABP2
GOCC:0034774	Secretory granule lumen	12	231	1.33	8.28e-11	9606.ENSP00000245907,9606.ENSP00000252699,9606.ENSP00000259396,9606.ENSP00000278407,9606.ENSP00000283752,9606.ENSP00000306099,9606.ENSP00000306361,9606.ENSP00000323929,9606.ENSP00000336829,9606.ENSP00000346032,9606.ENSP00000362924,9606.ENSP00000393887	C3,ACTN4,ORM1,SERPING1,SERPINB3,FGB,FGA,A2M,FGG,ANXA2,GSN,AHSG
GOCC:0030141	Secretory granule	17	714	1	8.92e-11	9606.ENSP00000215754,9606.ENSP00000245907,9606.ENSP00000252699,9606.ENSP00000259396,9606.ENSP00000278407,9606.ENSP00000283752,9606.ENSP00000306099,9606.ENSP00000306361,9606.ENSP00000320171,9606.ENSP00000323929,9606.ENSP00000336829,9606.ENSP00000345672,9606.ENSP00000346032,9606.ENSP00000359991,9606.ENSP00000362924,9606.ENSP00000379191,9606.ENSP00000393887	MIF,C3,ACTN4,ORM1,SERPING1,SERPINB3,FGB,FGA,PKM,A2M,FGG,CTSB,ANXA2,PGAM1,GSN,CD59,AHSG
GOCC:0099503	Secretory vesicle	17	797	0.95	4.64e-10	9606.ENSP00000215754,9606.ENSP00000245907,9606.ENSP00000252699,9606.ENSP00000259396,9606.ENSP00000278407,9606.ENSP00000283752,9606.ENSP00000306099,9606.ENSP00000306361,9606.ENSP00000320171,9606.ENSP00000323929,9606.ENSP00000336829,9606.ENSP00000345672,9606.ENSP00000346032,9606.ENSP00000359991,9606.ENSP00000362924,9606.ENSP00000379191,9606.ENSP00000393887	MIF,C3,ACTN4,ORM1,SERPING1,SERPINB3,FGB,FGA,PKM,A2M,FGG,CTSB,ANXA2,PGAM1,GSN,CD59,AHSG
GOCC:0031093	Platelet alpha granule lumen	8	68	1.69	1.81e-09	9606.ENSP00000252699,9606.ENSP00000259396,9606.ENSP00000278407,9606.ENSP00000306099,9606.ENSP00000306361,9606.ENSP00000323929,9606.ENSP00000336829,9606.ENSP00000393887	ACTN4,ORM1,SERPING1,FGB,FGA,A2M,FGG,AHSG
GOCC:0031091	Platelet alpha granule	8	91	1.56	1.48e-08	9606.ENSP00000252699,9606.ENSP00000259396,9606.ENSP00000278407,9606.ENSP00000306099,9606.ENSP00000306361,9606.ENSP00000323929,9606.ENSP00000336829,9606.ENSP00000393887	ACTN4,ORM1,SERPING1,FGB,FGA,A2M,FGG,AHSG
GOCC:0031410	Cytoplasmic vesicle	20	1909	0.64	7.66e-07	9606.ENSP00000215754,9606.ENSP00000245907,9606.ENSP00000251595,9606.ENSP00000252699,9606.ENSP00000259396,9606.ENSP00000262030,9606.ENSP00000278407,9606.ENSP00000283752,9606.ENSP00000300289,9606.ENSP00000306099,9606.ENSP00000306361,9606.ENSP00000320171,9606.ENSP00000323929,9606.ENSP00000336829,9606.ENSP00000345672,9606.ENSP00000346032,9606.ENSP00000359991,9606.ENSP00000362924,9606.ENSP00000379191,…	MIF,C3,HBA2,ACTN4,ORM1,ATP5B,SERPING1,SERPINB3,PDIA3,FGB,FGA,PKM,A2M,FGG,CTSB,ANXA2,PGAM1,GSN,CD59,AHSG
GOCC:0097708	Intracellular vesicle	20	1911	0.64	7.66e-07	9606.ENSP00000215754,9606.ENSP00000245907,9606.ENSP00000251595,9606.ENSP00000252699,9606.ENSP00000259396,9606.ENSP00000262030,9606.ENSP00000278407,9606.ENSP00000283752,9606.ENSP00000300289,9606.ENSP00000306099,9606.ENSP00000306361,9606.ENSP00000320171,9606.ENSP00000323929,9606.ENSP00000336829,9606.ENSP00000345672,9606.ENSP00000346032,9606.ENSP00000359991,9606.ENSP00000362924,9606.ENSP00000379191,…	MIF,C3,HBA2,ACTN4,ORM1,ATP5B,SERPING1,SERPINB3,PDIA3,FGB,FGA,PKM,A2M,FGG,CTSB,ANXA2,PGAM1,GSN,CD59,AHSG
GOCC:0110165	Cellular anatomical entity	43	10200	0.24	1.08e-06	9606.ENSP00000215754,9606.ENSP00000226218,9606.ENSP00000245907,9606.ENSP00000251595,9606.ENSP00000252699,9606.ENSP00000259396,9606.ENSP00000262030,9606.ENSP00000263238,9606.ENSP00000263867,9606.ENSP00000264335,9606.ENSP00000264613,9606.ENSP00000278407,9606.ENSP00000280357,9606.ENSP00000283752,9606.ENSP00000290378,9606.ENSP00000296370,9606.ENSP00000296503,9606.ENSP00000300289,9606.ENSP00000306099,…	MIF,VTN,C3,HBA2,ACTN4,ORM1,ATP5B,ACTR3,CAPG,YWHAE,CP,SERPING1,IL18,SERPINB3,ACTC1,S100P,HMGB2,PDIA3,FGB,FGA,PKM,A2M,FGG,SERPINB13,CTSB,ANXA2,AGT,ACTA1,PGAM1,PGK1,GSN,KLK6,YWHAQ,ANXA4,CD59,ACTG2,AHSG,ACTA2,MUC5B,LDHA,SOD2,MYL6,CRABP2
GOCC:0012505	Endomembrane system	26	3482	0.49	1.17e-06	9606.ENSP00000215754,9606.ENSP00000245907,9606.ENSP00000252699,9606.ENSP00000259396,9606.ENSP00000262030,9606.ENSP00000264613,9606.ENSP00000278407,9606.ENSP00000283752,9606.ENSP00000296503,9606.ENSP00000300289,9606.ENSP00000306099,9606.ENSP00000306361,9606.ENSP00000320171,9606.ENSP00000323929,9606.ENSP00000336829,9606.ENSP00000341584,9606.ENSP00000345672,9606.ENSP00000346032,9606.ENSP00000359991,…	MIF,C3,ACTN4,ORM1,ATP5B,CP,SERPING1,SERPINB3,HMGB2,PDIA3,FGB,FGA,PKM,A2M,FGG,SERPINB13,CTSB,ANXA2,PGAM1,ST6GALNAC6,GSN,ANXA4,CD59,AHSG,MUC5B,CRABP2
GOCC:0043226	Organelle	43	10363	0.24	1.81e-06	9606.ENSP00000215754,9606.ENSP00000222553,9606.ENSP00000226218,9606.ENSP00000245907,9606.ENSP00000251595,9606.ENSP00000252699,9606.ENSP00000259396,9606.ENSP00000262030,9606.ENSP00000263238,9606.ENSP00000263867,9606.ENSP00000264335,9606.ENSP00000264613,9606.ENSP00000278407,9606.ENSP00000283752,9606.ENSP00000290378,9606.ENSP00000296370,9606.ENSP00000296503,9606.ENSP00000300289,9606.ENSP00000306099,…	MIF,NAMPT,VTN,C3,HBA2,ACTN4,ORM1,ATP5B,ACTR3,CAPG,YWHAE,CP,SERPING1,SERPINB3,ACTC1,S100P,HMGB2,PDIA3,FGB,FGA,PKM,A2M,FGG,SERPINB13,CTSB,ANXA2,ACTA1,PGAM1,ST6GALNAC6,PGK1,GSN,KLK6,ANXA4,CD59,ACTG2,AHSG,ACTA2,GC,MUC5B,LDHA,SOD2,MYL6,CRABP2
GOCC:0005622	Intracellular	45	11757	0.2	2.68e-06	9606.ENSP00000215754,9606.ENSP00000222553,9606.ENSP00000226218,9606.ENSP00000245907,9606.ENSP00000251595,9606.ENSP00000252699,9606.ENSP00000259396,9606.ENSP00000262030,9606.ENSP00000263238,9606.ENSP00000263867,9606.ENSP00000264335,9606.ENSP00000264613,9606.ENSP00000278407,9606.ENSP00000280357,9606.ENSP00000283752,9606.ENSP00000290378,9606.ENSP00000296370,9606.ENSP00000296503,9606.ENSP00000300289,…	MIF,NAMPT,VTN,C3,HBA2,ACTN4,ORM1,ATP5B,ACTR3,CAPG,YWHAE,CP,SERPING1,IL18,SERPINB3,ACTC1,S100P,HMGB2,PDIA3,FGB,FGA,PKM,A2M,FGG,SERPINB13,CTSB,ANXA2,ACTA1,PGAM1,ST6GALNAC6,PGK1,GSN,KLK6,YWHAQ,ANXA4,CD59,ACTG2,AHSG,ACTA2,GC,MUC5B,LDHA,SOD2,MYL6,CRABP2
GOCC:0043229	Intracellular organelle	42	9926	0.25	2.68e-06	9606.ENSP00000215754,9606.ENSP00000222553,9606.ENSP00000226218,9606.ENSP00000245907,9606.ENSP00000251595,9606.ENSP00000252699,9606.ENSP00000259396,9606.ENSP00000262030,9606.ENSP00000263238,9606.ENSP00000263867,9606.ENSP00000264335,9606.ENSP00000264613,9606.ENSP00000278407,9606.ENSP00000283752,9606.ENSP00000290378,9606.ENSP00000296370,9606.ENSP00000296503,9606.ENSP00000300289,9606.ENSP00000306099,…	MIF,NAMPT,VTN,C3,HBA2,ACTN4,ORM1,ATP5B,ACTR3,CAPG,YWHAE,CP,SERPING1,SERPINB3,ACTC1,S100P,HMGB2,PDIA3,FGB,FGA,PKM,A2M,FGG,SERPINB13,CTSB,ANXA2,ACTA1,PGAM1,ST6GALNAC6,GSN,KLK6,ANXA4,CD59,ACTG2,AHSG,ACTA2,GC,MUC5B,LDHA,SOD2,MYL6,CRABP2
GOCC:0031974	Membrane-enclosed lumen	26	3655	0.47	2.74e-06	9606.ENSP00000215754,9606.ENSP00000226218,9606.ENSP00000245907,9606.ENSP00000251595,9606.ENSP00000252699,9606.ENSP00000259396,9606.ENSP00000262030,9606.ENSP00000263867,9606.ENSP00000278407,9606.ENSP00000283752,9606.ENSP00000300289,9606.ENSP00000306099,9606.ENSP00000306361,9606.ENSP00000320171,9606.ENSP00000323929,9606.ENSP00000336829,9606.ENSP00000341584,9606.ENSP00000345672,9606.ENSP00000346032,…	MIF,VTN,C3,HBA2,ACTN4,ORM1,ATP5B,CAPG,SERPING1,SERPINB3,PDIA3,FGB,FGA,PKM,A2M,FGG,SERPINB13,CTSB,ANXA2,PGAM1,GSN,KLK6,AHSG,GC,MUC5B,SOD2
GOCC:0043233	Organelle lumen	26	3655	0.47	2.74e-06	9606.ENSP00000215754,9606.ENSP00000226218,9606.ENSP00000245907,9606.ENSP00000251595,9606.ENSP00000252699,9606.ENSP00000259396,9606.ENSP00000262030,9606.ENSP00000263867,9606.ENSP00000278407,9606.ENSP00000283752,9606.ENSP00000300289,9606.ENSP00000306099,9606.ENSP00000306361,9606.ENSP00000320171,9606.ENSP00000323929,9606.ENSP00000336829,9606.ENSP00000341584,9606.ENSP00000345672,9606.ENSP00000346032,…	MIF,VTN,C3,HBA2,ACTN4,ORM1,ATP5B,CAPG,SERPING1,SERPINB3,PDIA3,FGB,FGA,PKM,A2M,FGG,SERPINB13,CTSB,ANXA2,PGAM1,GSN,KLK6,AHSG,GC,MUC5B,SOD2
GOCC:0070013	Intracellular organelle lumen	26	3653	0.47	2.74e-06	9606.ENSP00000215754,9606.ENSP00000226218,9606.ENSP00000245907,9606.ENSP00000251595,9606.ENSP00000252699,9606.ENSP00000259396,9606.ENSP00000262030,9606.ENSP00000263867,9606.ENSP00000278407,9606.ENSP00000283752,9606.ENSP00000300289,9606.ENSP00000306099,9606.ENSP00000306361,9606.ENSP00000320171,9606.ENSP00000323929,9606.ENSP00000336829,9606.ENSP00000341584,9606.ENSP00000345672,9606.ENSP00000346032,…	MIF,VTN,C3,HBA2,ACTN4,ORM1,ATP5B,CAPG,SERPING1,SERPINB3,PDIA3,FGB,FGA,PKM,A2M,FGG,SERPINB13,CTSB,ANXA2,PGAM1,GSN,KLK6,AHSG,GC,MUC5B,SOD2
GOCC:0005869	Dynactin complex	4	12	2.14	5.35e-06	9606.ENSP00000290378,9606.ENSP00000355645,9606.ENSP00000386857,9606.ENSP00000402373	ACTC1,ACTA1,ACTG2,ACTA2
GOCC:0043227	Membrane-bounded organelle	40	9289	0.25	9.65e-06	9606.ENSP00000215754,9606.ENSP00000222553,9606.ENSP00000226218,9606.ENSP00000245907,9606.ENSP00000251595,9606.ENSP00000252699,9606.ENSP00000259396,9606.ENSP00000262030,9606.ENSP00000263238,9606.ENSP00000263867,9606.ENSP00000264335,9606.ENSP00000264613,9606.ENSP00000278407,9606.ENSP00000283752,9606.ENSP00000296370,9606.ENSP00000296503,9606.ENSP00000300289,9606.ENSP00000306099,9606.ENSP00000306361,…	MIF,NAMPT,VTN,C3,HBA2,ACTN4,ORM1,ATP5B,ACTR3,CAPG,YWHAE,CP,SERPING1,SERPINB3,S100P,HMGB2,PDIA3,FGB,FGA,PKM,A2M,FGG,SERPINB13,CTSB,ANXA2,ACTA1,PGAM1,ST6GALNAC6,PGK1,GSN,KLK6,ANXA4,CD59,AHSG,ACTA2,GC,MUC5B,LDHA,SOD2,CRABP2
GOCC:0015629	Actin cytoskeleton	9	402	0.97	4.64e-05	9606.ENSP00000252699,9606.ENSP00000263238,9606.ENSP00000263867,9606.ENSP00000290378,9606.ENSP00000355645,9606.ENSP00000362924,9606.ENSP00000386857,9606.ENSP00000402373,9606.ENSP00000446955	ACTN4,ACTR3,CAPG,ACTC1,ACTA1,GSN,ACTG2,ACTA2,MYL6
GOCC:0005829	Cytosol	22	3099	0.47	6.01e-05	9606.ENSP00000215754,9606.ENSP00000222553,9606.ENSP00000251595,9606.ENSP00000252699,9606.ENSP00000263238,9606.ENSP00000264335,9606.ENSP00000278407,9606.ENSP00000280357,9606.ENSP00000290378,9606.ENSP00000320171,9606.ENSP00000323929,9606.ENSP00000355645,9606.ENSP00000359991,9606.ENSP00000362924,9606.ENSP00000366047,9606.ENSP00000371267,9606.ENSP00000386857,9606.ENSP00000402373,9606.ENSP00000421725,…	MIF,NAMPT,HBA2,ACTN4,ACTR3,YWHAE,SERPING1,IL18,ACTC1,PKM,A2M,ACTA1,PGAM1,GSN,KLK6,YWHAQ,ACTG2,ACTA2,GC,LDHA,MYL6,CRABP2
GOCC:0009986	Cell surface	9	433	0.94	7.96e-05	9606.ENSP00000215754,9606.ENSP00000262030,9606.ENSP00000300289,9606.ENSP00000306099,9606.ENSP00000306361,9606.ENSP00000336829,9606.ENSP00000346032,9606.ENSP00000377833,9606.ENSP00000379191	MIF,ATP5B,PDIA3,FGB,FGA,FGG,ANXA2,ANXA4,CD59
GOCC:0005575	Cellular_component	47	14755	0.12	0.00015	9606.ENSP00000215754,9606.ENSP00000222553,9606.ENSP00000226218,9606.ENSP00000245907,9606.ENSP00000251595,9606.ENSP00000252699,9606.ENSP00000259396,9606.ENSP00000262030,9606.ENSP00000263238,9606.ENSP00000263867,9606.ENSP00000264335,9606.ENSP00000264613,9606.ENSP00000278407,9606.ENSP00000280357,9606.ENSP00000283752,9606.ENSP00000290378,9606.ENSP00000296370,9606.ENSP00000296503,9606.ENSP00000300289,…	MIF,NAMPT,VTN,C3,HBA2,ACTN4,ORM1,ATP5B,ACTR3,CAPG,YWHAE,CP,SERPING1,IL18,SERPINB3,ACTC1,S100P,HMGB2,PDIA3,FGB,FGA,KLK10,PKM,A2M,FGG,SERPINB13,CTSB,ANXA2,AGT,ACTA1,PGAM1,ST6GALNAC6,PGK1,GSN,KLK6,YWHAQ,ANXA4,CD59,ACTG2,AHSG,ACTA2,GC,MUC5B,LDHA,SOD2,MYL6,CRABP2
GOCC:0005775	Vacuolar lumen	6	179	1.14	0.00043	9606.ENSP00000245907,9606.ENSP00000283752,9606.ENSP00000341584,9606.ENSP00000345672,9606.ENSP00000346032,9606.ENSP00000421725	C3,SERPINB3,SERPINB13,CTSB,ANXA2,GC
GOCC:1904813	Ficolin-1-rich granule lumen	5	125	1.22	0.0012	9606.ENSP00000215754,9606.ENSP00000320171,9606.ENSP00000345672,9606.ENSP00000359991,9606.ENSP00000362924	MIF,PKM,CTSB,PGAM1,GSN
GOCC:0005577	Fibrinogen complex	3	19	1.82	0.0015	9606.ENSP00000306099,9606.ENSP00000306361,9606.ENSP00000336829	FGB,FGA,FGG
GOCC:0005912	Adherens junction	7	351	0.92	0.0017	9606.ENSP00000252699,9606.ENSP00000263238,9606.ENSP00000264335,9606.ENSP00000290378,9606.ENSP00000300289,9606.ENSP00000362924,9606.ENSP00000371267	ACTN4,ACTR3,YWHAE,ACTC1,PDIA3,GSN,YWHAQ
GOCC:0070161	Anchoring junction	8	516	0.81	0.0023	9606.ENSP00000252699,9606.ENSP00000263238,9606.ENSP00000264335,9606.ENSP00000290378,9606.ENSP00000300289,9606.ENSP00000362924,9606.ENSP00000371267,9606.ENSP00000379191	ACTN4,ACTR3,YWHAE,ACTC1,PDIA3,GSN,YWHAQ,CD59
GOCC:0005925	Focal adhesion	6	255	0.99	0.0026	9606.ENSP00000252699,9606.ENSP00000263238,9606.ENSP00000264335,9606.ENSP00000290378,9606.ENSP00000300289,9606.ENSP00000362924	ACTN4,ACTR3,YWHAE,ACTC1,PDIA3,GSN
GOCC:0030055	Cell-substrate junction	6	263	0.98	0.003	9606.ENSP00000252699,9606.ENSP00000263238,9606.ENSP00000264335,9606.ENSP00000290378,9606.ENSP00000300289,9606.ENSP00000362924	ACTN4,ACTR3,YWHAE,ACTC1,PDIA3,GSN
GOCC:1902912	Pyruvate kinase complex	2	4	2.32	0.0059	9606.ENSP00000320171,9606.ENSP00000445175	PKM,LDHA
GOCC:0101002	Ficolin-1-rich granule	5	186	1.05	0.0062	9606.ENSP00000215754,9606.ENSP00000320171,9606.ENSP00000345672,9606.ENSP00000359991,9606.ENSP00000362924	MIF,PKM,CTSB,PGAM1,GSN
GOCC:0009897	External side of plasma membrane	4	104	1.2	0.0086	9606.ENSP00000306099,9606.ENSP00000306361,9606.ENSP00000336829,9606.ENSP00000379191	FGB,FGA,FGG,CD59
GOCC:0005764	Lysosome	7	549	0.72	0.0214	9606.ENSP00000245907,9606.ENSP00000264613,9606.ENSP00000283752,9606.ENSP00000341584,9606.ENSP00000345672,9606.ENSP00000346032,9606.ENSP00000421725	C3,CP,SERPINB3,SERPINB13,CTSB,ANXA2,GC
GOCC:0032991	Protein-containing complex	26	5939	0.26	0.0214	9606.ENSP00000222553,9606.ENSP00000226218,9606.ENSP00000245907,9606.ENSP00000251595,9606.ENSP00000252699,9606.ENSP00000259396,9606.ENSP00000262030,9606.ENSP00000263238,9606.ENSP00000263867,9606.ENSP00000280357,9606.ENSP00000290378,9606.ENSP00000296503,9606.ENSP00000300289,9606.ENSP00000306099,9606.ENSP00000306361,9606.ENSP00000320171,9606.ENSP00000336829,9606.ENSP00000346032,9606.ENSP00000355645,…	NAMPT,VTN,C3,HBA2,ACTN4,ORM1,ATP5B,ACTR3,CAPG,IL18,ACTC1,HMGB2,PDIA3,FGB,FGA,PKM,FGG,ANXA2,ACTA1,GSN,YWHAQ,CD59,ACTG2,ACTA2,LDHA,MYL6
GOCC:0000323	Lytic vacuole	7	553	0.72	0.0216	9606.ENSP00000245907,9606.ENSP00000264613,9606.ENSP00000283752,9606.ENSP00000341584,9606.ENSP00000345672,9606.ENSP00000346032,9606.ENSP00000421725	C3,CP,SERPINB3,SERPINB13,CTSB,ANXA2,GC
GOCC:0062167	Complement component C1q complex	2	11	1.88	0.0262	9606.ENSP00000245907,9606.ENSP00000278407	C3,SERPING1
GOCC:0005875	Microtubule associated complex	4	149	1.05	0.0291	9606.ENSP00000290378,9606.ENSP00000355645,9606.ENSP00000386857,9606.ENSP00000402373	ACTC1,ACTA1,ACTG2,ACTA2
GOCC:0005579	Membrane attack complex	2	12	1.84	0.0293	9606.ENSP00000245907,9606.ENSP00000379191	C3,CD59
GOCC:0005788	Endoplasmic reticulum lumen	4	151	1.04	0.0293	9606.ENSP00000245907,9606.ENSP00000300289,9606.ENSP00000306361,9606.ENSP00000336829	C3,PDIA3,FGA,FGG
GOCC:0005884	Actin filament	3	63	1.3	0.0297	9606.ENSP00000290378,9606.ENSP00000355645,9606.ENSP00000362924	ACTC1,ACTA1,GSN
GOCC:0030054	Cell junction	8	823	0.61	0.0399	9606.ENSP00000252699,9606.ENSP00000263238,9606.ENSP00000264335,9606.ENSP00000290378,9606.ENSP00000300289,9606.ENSP00000362924,9606.ENSP00000371267,9606.ENSP00000379191	ACTN4,ACTR3,YWHAE,ACTC1,PDIA3,GSN,YWHAQ,CD59
